# Spontaneous activity changes in large-scale cortical networks in older adults couple to distinct hemodynamic morphology

Tatiana Sitnikova<sup>ab</sup>, Jeremy W. Hughes<sup>ac</sup>, Casey M. Howard<sup>a</sup>, Kimberly A. Stephens<sup>a</sup>, Mark W. Woolrich<sup>d</sup>, David H. Salat<sup>ab</sup>

<sup>a</sup> Martinos Center for Biomedical Imaging, Massachusetts General Hospital, Charlestown, MA 02129, USA

<sup>b</sup> Harvard Medical School, Boston, MA 02115, USA

<sup>c</sup> University of California—Berkeley, Berkeley, CA 94720, USA

<sup>d</sup> Oxford Center for Human Brain Activity, University of Oxford, Oxford OX3 7JX, UK

Corresponding author:

Tatiana Sitnikova

**Email:** [tatiana@nmr.mgh.harvard.edu](mailto:tatiana@nmr.mgh.harvard.edu)

## Abstract

Neurovascular coupling is a dynamic core mechanism supporting brain energy demand. Therefore, even spontaneous changes in neural activity are expected to evoke a vascular hemodynamic response (HDR). Here, we developed a novel procedure for estimating transient states in intrinsic activity of neural networks based on source-localized electroencephalogram in combination with HDR estimation based on simultaneous rapid-acquisition functional magnetic resonance imaging. We demonstrate a readily apparent spatiotemporal correspondence between electrophysiological and HDR signals, describing for the first time how features of neurovascular coupling may differ among large-scale brain networks. In the default mode network, the HDR pattern in our older adult participants was associated with a surrogate marker of cerebrovascular deterioration and predicted alterations in temporal structure of fast intrinsic electrophysiological activity linked to memory decline. These results show the potential of our technique for making inferences about neural and vascular processes in higher-level cognitive networks in healthy and at-risk populations.

1 Intrinsic neural activity not explicitly associated with performing a task is an indicator of brain health.  
2 However, our understanding of how natural activity patterns arise is far from complete. The consequences of  
3 dysregulated intrinsic neuronal firing on life-sustaining cellular processes, such as gene expression and protein  
4 synthesis, are highlighted by animal models<sup>1</sup>. In the human brain, large-scale recordings at the cell population  
5 level link abnormal intrinsic neural activity to the progression of brain disorders, such as Alzheimer's  
6 dementia<sup>2-4</sup>. Much of what we know about intrinsic neural activity in humans comes from functional magnetic  
7 resonance imaging (fMRI), which relies on neurovascular coupling to make inferences about neural activity<sup>5</sup>.  
8 Inherently, variations not only in neural activity but also in properties of the associated vascular support,  
9 which is the signal detected by fMRI, can influence patterns in the data, especially in the aging brain prone to  
10 cerebrovascular changes and patients with brain disorders accompanied by vascular comorbidities<sup>6-8</sup>.  
11 Therefore, new procedures for disambiguating between the neural and hemodynamic features in the human  
12 brain are needed.

13 Studies using fMRI have demonstrated that large-scale brain networks recruited by tasks are also  
14 spontaneously reactivated during resting state<sup>9-12</sup>. Two recent analytic approaches, focusing on  
15 electrophysiological correlates of neural activity that are temporally resolved on rapid scales of cognition<sup>13</sup>,  
16 suggested that such spontaneous reactivations may constitute transient states of network activity coupled to  
17 local vascular hemodynamic response (HDR). First, a novel mathematical tool based on the Hidden Markov  
18 Model (HMM) discerned recurring transient states of spatially coordinated amplitude changes (on average  
19 100-ms-long) in resting magnetoencephalographic (MEG) data in both young and older adults<sup>14-16</sup>. This  
20 method demonstrated topographic correspondence between the estimated cortical loci of the unique rapid  
21 activity states and the large-scale networks previously observed with resting fMRI, raising a question of how  
22 the two imaging modalities are linked in real time. A second, complimentary technique showed temporal  
23 concurrence between the features of electrophysiological and HDR signals through simultaneously recording  
24 electroencephalographic (EEG) and fMRI resting data<sup>17-19</sup>. However, reliance on the assumed 'canonical'  
25 HDR shape to relate brief EEG states, when non-identical scalp-signal distributions suggested distinct neural  
26 sources, to hemodynamic fluctuations in brain networks lessened generalizability of this method. The  
27 canonical HDR shape has been estimated in sensory/motor primary cortices in young healthy participants<sup>20-23</sup>  
28 and may not accurately describe the HDR in other large-scale networks or participant populations. The goal of  
29 the present study was to build and improve on these prior efforts by assembling a data-driven technique for  
30 estimating rapid electrophysiological network activity and the associated HDR, with an intent to advance both  
31 basic and clinical investigation of the intrinsic brain activity in relation to neurovascular coupling.

32 This study extends our prior MEG-based application of the HMM<sup>14-16</sup> to the resting high-density EEG,  
33 source-localized to 38 regions in the entire cortex. The HDR patterns associated with different amounts of  
34 time spent in a given HMM state during timeframes in the simultaneously acquired fMRI data are estimated  
35 without *a priori* assumptions about the canonical HDR shape – by using finite impulse response (FIR) basis  
36 functions<sup>23</sup> and shape-flexible gamma function<sup>22</sup>. This methodology establishes both spatial and temporal  
37 correspondence between the electrophysiological and hemodynamic activity in cortical networks in the resting  
38 brain, as well as delineates the morphology of HDR evoked by distinct electrophysiological network states.  
39 When we previously described electrophysiological network states in older adults based on HMM applied to a  
40 resting MEG, we observed spatial differentiation between coordinated activity states with amplitudes higher or  
41 lower than the session average<sup>16</sup>. Here, we describe the HDR evoked to meet the metabolic demand associated  
42 with opposite-polarity modulations in electrophysiological amplitude of similar states, inferred in older adults  
43 based on EEG. We also assess the relationship between HDR patterns and the temporal structure of  
44 electrophysiological activity states, in the context of variable cerebrovascular and cognitive decline across  
45 older adults. Given that the brain disproportionately consumes energy compared with other organs<sup>24</sup> but  
46 maintains almost no energy reserve<sup>25</sup>, the HDR that promptly supplies nutrients for energy homeostasis<sup>26</sup> may  
47 be closely linked to intrinsic neural activity, and any de-coupling may disrupt the intrinsic neural patterns.  
48 Although we examined several cortical networks, we focused on the default mode network (DMN), which is  
49 implicated in episodic memory and is vulnerable to age-associated changes<sup>27</sup>, in comparison to the dorsal  
50 attention network (DAN), which tends to remain functionally intact in early stages of neurodegenerative  
51 disorders, such as Alzheimer's dementia<sup>28,29</sup>.

## 1 Results

2 **Brief network states in source-localized EEG were discerned using HMM.** Electrophysiological states  
3 lasting only a fraction of a second were detected in resting-state high-density 256-channel EEG of 15 older  
4 adults, which was source-localized to 38 brain regions using beamforming<sup>14</sup> with spatial signal leakage  
5 reduction via orthogonalization<sup>30</sup>. This was the first application of the HMM that enabled to discern transient  
6 states of coordinated cortical activity based on EEG. Figure 1 illustrates the basic principle of HMM state  
7 inference on a sample segment of data. States inferred by HMM feature spatially coordinated changes in the  
8 amplitude of band-limited (4-30 Hz) electrophysiological activity that recurred in unique brain networks at  
9 distinct points in time. Comparable results were observed when HMMs with 10, 12, and 14 states were  
10 inferred based on the time-courses of activity amplitudes concatenated across participants. The resulting  
11 HMM states had clear spatial correspondence across participants, but each participant displayed their own  
12 state time-course, indicating when different states were most probable.

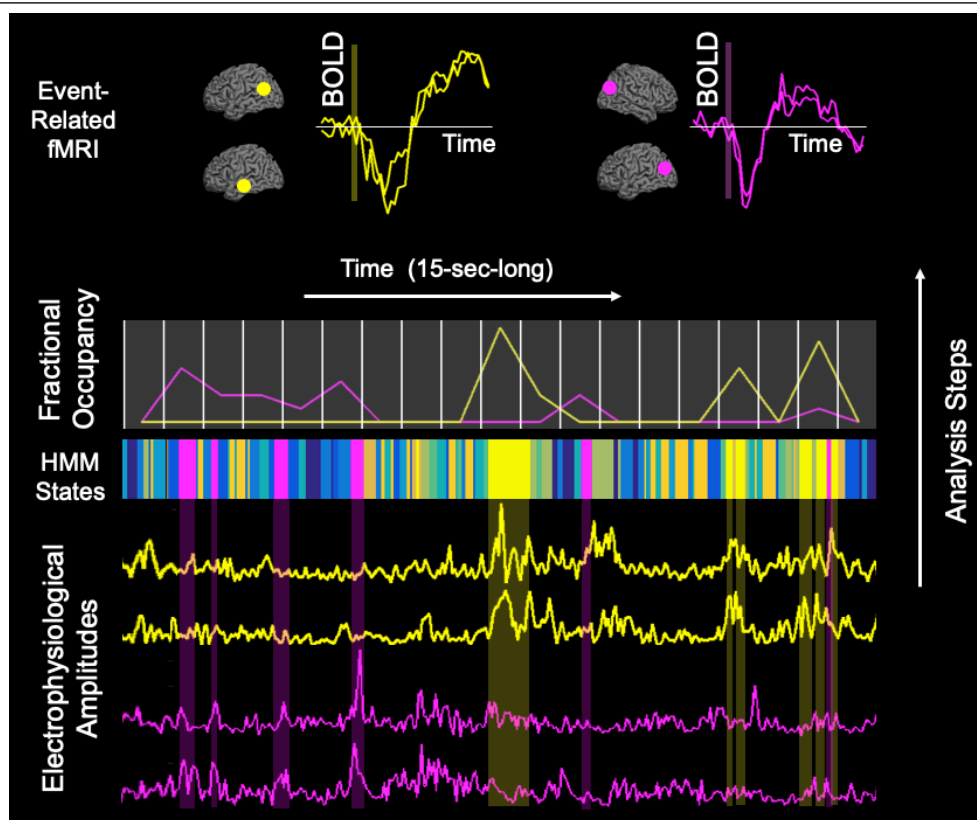

**Figure 1.** Analysis steps for simultaneously acquired EEG/fMRI data are illustrated based on a sample 15-s data segment from an individual participant (see Methods for further details). From bottom to top: HMM analysis applied to EEG-based electrophysiological amplitudes inferred a time-course of 10 recurring HMM states, which was converted into time-courses of fractional occupancy that were used as regressors to model neurally evoked HDR in event-related fMRI analysis. The multicolored band (middle panel) shows a sequence of inferred HMM states; 10 different colors correspond to 10 states characterized by distinct spatial patterns of electrophysiological activity. The yellow HMM state reflects rises in electrophysiological amplitudes (yellow time-courses in lower panel) that are source-localized to nodes of the DMN (yellow dots on cerebral cortex in upper panel). Likewise, the magenta HMM state reflects rises in (magenta) electrophysiological amplitudes that are source-localized to nodes of the visual network (VisN/magenta dots). Fractional occupancy was computed as the time in ms when each electrophysiological network state was active during each of 800-ms consecutive fMRI acquisition frames, demarcated by vertical white lines on a shaded background (middle panel); DMN/yellow and VisN/magenta time-courses of this fractional occupancy show different fluctuation patterns across frames. Deconvolved BOLD changes (left upper panel: DMN/yellow; right upper panel: VisN/magenta) were time-locked to ‘trigger’ frames with non-zero electrophysiological fractional occupancy, illustrated by vertical yellow/magenta shaded bars.

1 Cortical topographies of EEG-based HMM states resembled those previously observed by MEG in  
2 young<sup>14</sup> and older adults<sup>16</sup> using similar analysis methods and showed overlap with classic large-scale  
3 functional networks described based on coordinated hemodynamic fluctuations measured by resting-state  
4 fMRI<sup>31–38</sup>. State topographies were visualized by computing partial correlations between state time-courses  
5 and electrophysiological amplitudes in different cortical regions for each participant. Group maps were  
6 derived by averaging across participants. Figure 2 shows maps of five salient states (see Supplemental Figure  
7 1 for maps of additional modeled states) indicating cortical regions that displayed higher or lower amplitudes  
8 in each state compared with average electrophysiological activity over time. State 1 was marked by increased  
9 amplitudes in regions overlapping the visual network (VisN), including the visual and posterior parietal  
10 cortices<sup>14,33</sup>. State 2 was marked by decreased amplitudes in regions overlapping the DAN, including the  
11 posterior lateral temporal cortex and intra-parietal sulcus and extending toward the frontal eye field<sup>14,31,39,40</sup>.  
12 State 3 was marked by increased amplitudes in regions overlapping the DMN, including the precuneus,  
13 posterior cingulate cortex, medial prefrontal cortex, temporal cortex, and inferior parietal lobe<sup>32,35</sup>. State 4 was  
14 marked by increased amplitudes in regions corresponding to the anterior DMN (aDMN), including medial and  
15 inferior-lateral prefrontal cortices and the temporal cortex<sup>41</sup>. Finally, state 5, which was clearly detected only  
16 in the 14-state HMM, was marked by amplitude increases in the sensorimotor network (SMN)<sup>14,33,34</sup>.

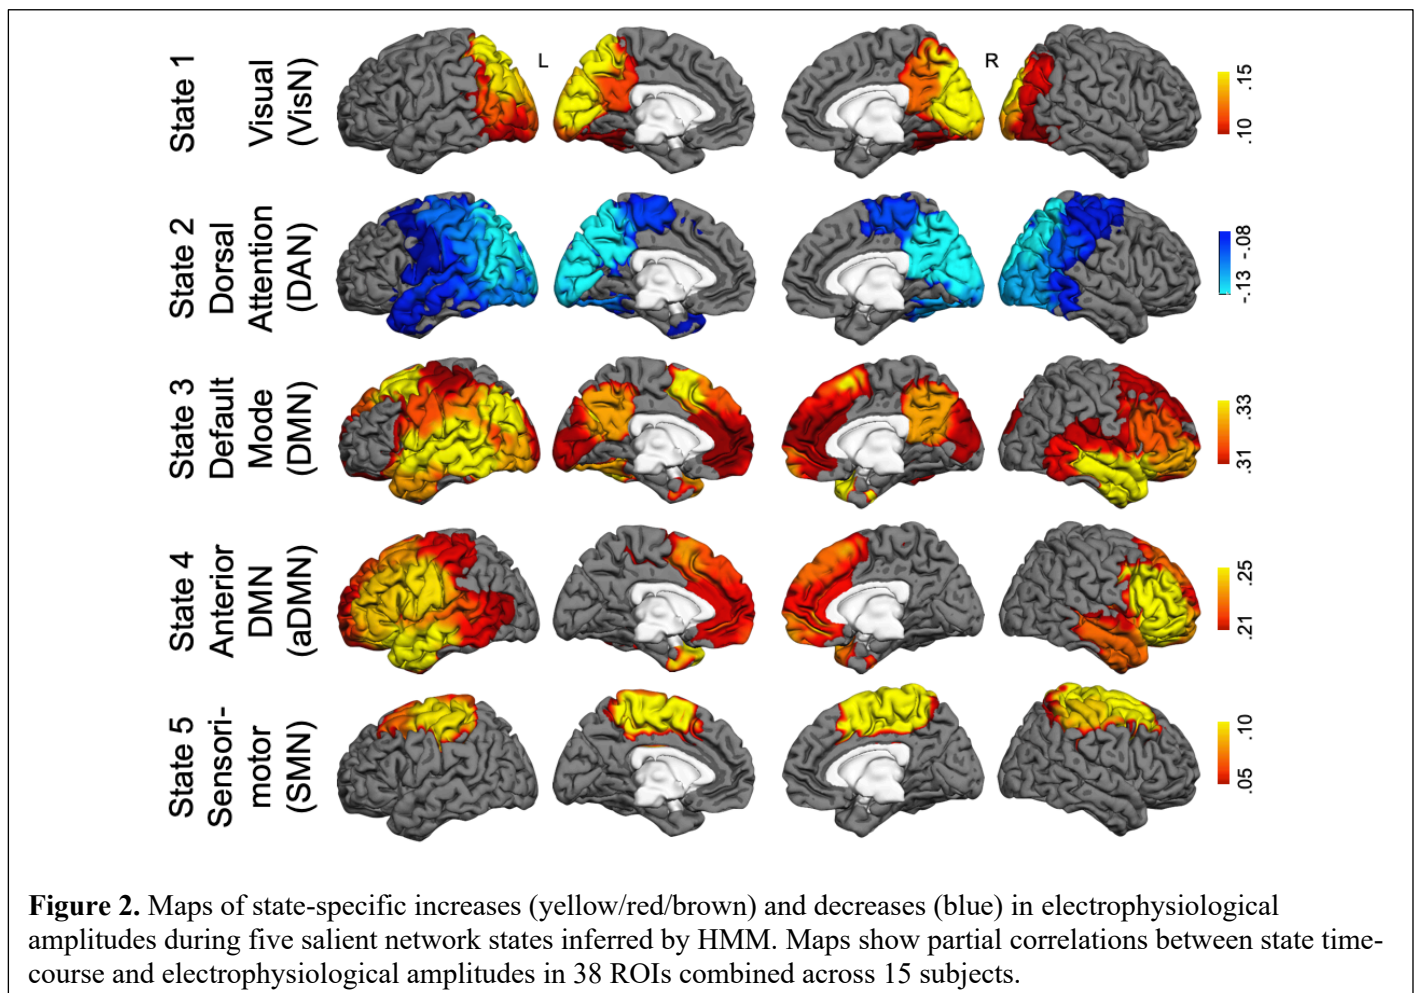

17 **Temporal pattern of electrophysiological activity states.** Time-courses of EEG-based HMM states describe  
18 time-varying patterns of coordinated electrophysiological activity in unique neural networks at timescales  
19 under 100 ms. Figure 3 illustrates statistical properties of the durations of coordinated activity states in each  
20 neural network, here termed “lifetimes” (previously also referred to as “dwell times”<sup>15,42,43</sup>). Supplemental  
21 Figure 2 shows this information for the durations of intervals between the activity states in each network. In  
22 addition to mean and standard deviation, we computed the probability density function (PDF), which reflects  
23 likelihood of different lifetime/interval values during the recording period. Recent innovative analyses of

1 electrophysiological recordings at micro and macro scales revealed temporal patterns in intrinsic neural  
 2 activity with heavy-tailed PDFs, approaching the power law distribution<sup>44–48</sup>, which tend to spatially organize  
 3 within commonly co-activated large-scale cortical modules<sup>49</sup>. These patterns may have physiological  
 4 significance, as they are indicative of a system near the state of so-called criticality, in which available  
 5 resources are kept at maximal availability for optimized responsiveness to the environment<sup>50,51</sup>. To describe  
 6 the temporal activity structure for each HMM state-defined cortical network and for each participant, we used  
 7 a statistic indicating the extent of deviation of the empirical PDFs from a fitted power law model<sup>52</sup>. When this  
 8 statistic was computed on state lifetimes, a comparison of DMN/aDMN states to the DAN state, while  
 9 regressing out the effects of age and sex, revealed differences in the extent of deviation from the power law  
 10 (effect of state in omnibus repeated-measures analysis of variance [rmANOVA],  $F=21.90$ ,  $p<0.05$ ; follow-up:  
 11  $DMN<DAN$ ,  $F=42.64$ , Cohen's  $d=4.89$ ,  $DMN<aDMN$ ,  $F=9.64$ ,  $d=0.68$ ,  $aDMN<DAN$ ,  $F=17.59$ ,  $d=1.45$ ,  
 12  $ps<0.05$ ). Thus, the DMN state showed temporal activity structure closest to critical behavior. Interestingly,  
 13 the DAN state characterized by reduced electrophysiological amplitudes, suggestive of reduced phase-locking  
 14 of low-frequency activity<sup>15</sup> and neuronal firing desynchronization<sup>53</sup>, showed the largest deviations from power  
 15 law and presumed criticality, consistent with findings in cats and monkeys<sup>53</sup>. Similar results for intervals  
 16 between the activity states in each network are reported in Supplemental Figure 2.

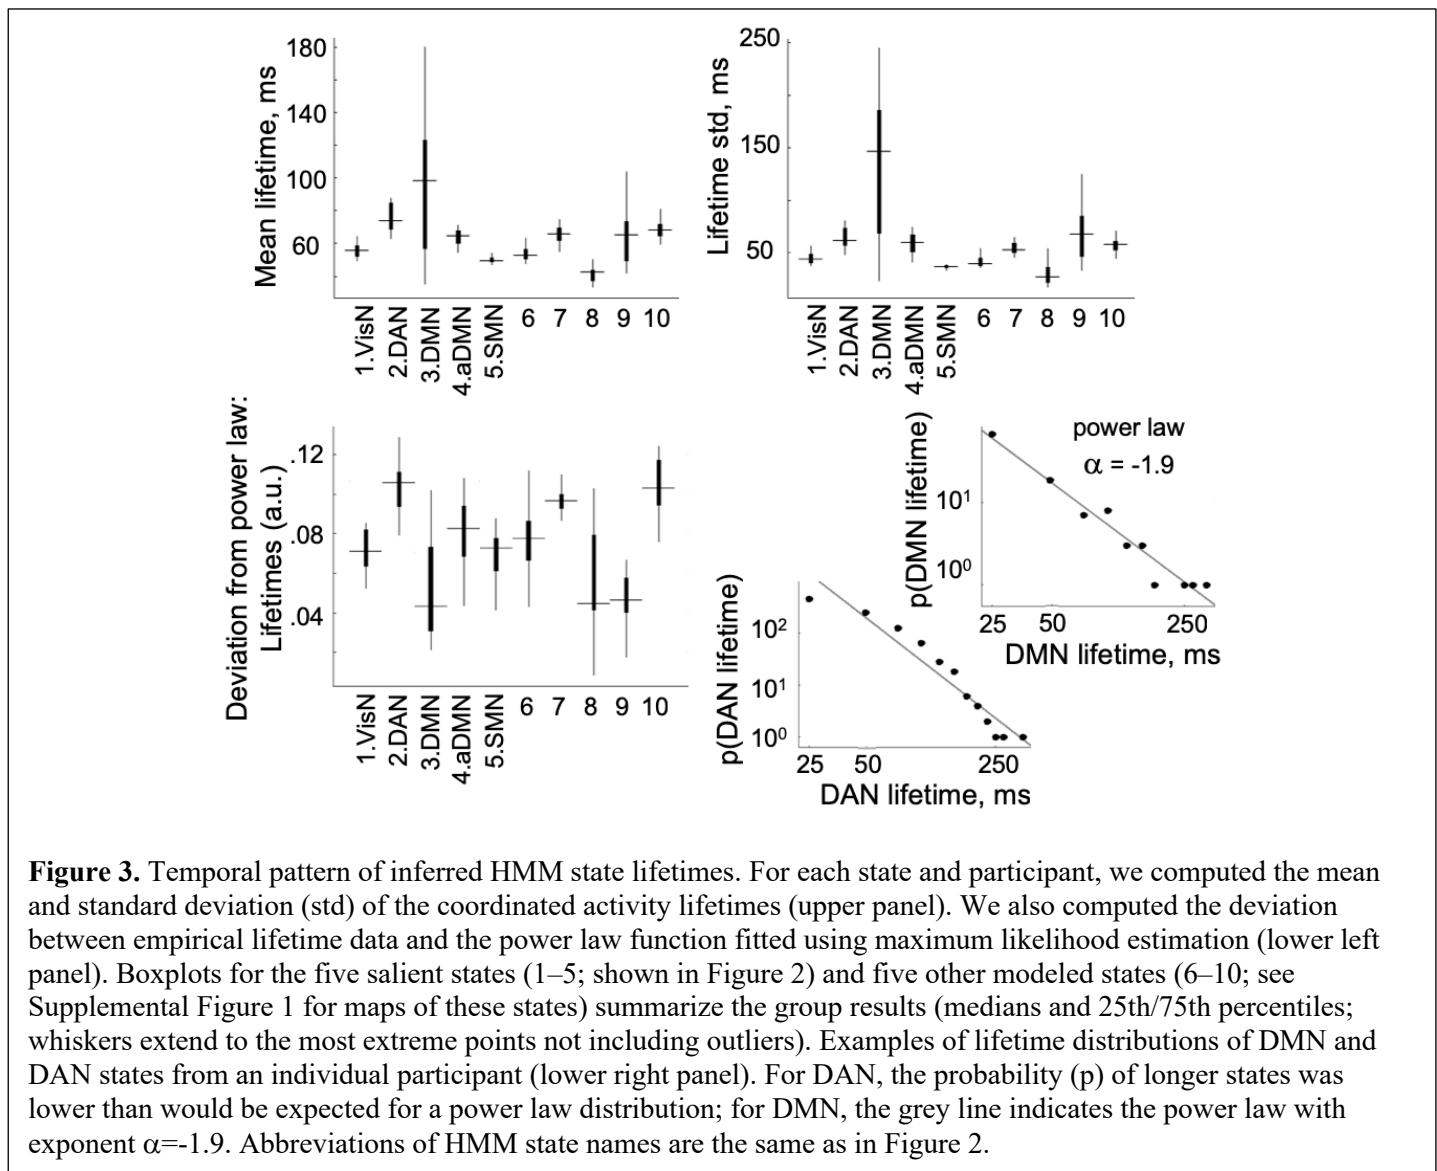

17 **HDR evoked by time-varying fractional occupancy of electrophysiological network states.** Because  
 18 HMM electrophysiological states showed an irregular pattern of recurrence (as illustrated in Figure 1), the  
 19 proportion of time spent in a given state during each 800-ms recording frame in simultaneously acquired fMRI

1 data varied over time. This time-varying fractional occupancy per fMRI frame computed for each state was  
 2 used as a predictor in general linear modeling (GLM) of state-specific changes in the blood oxygen level  
 3 dependent (BOLD) signal recorded by fMRI, which is sensitive to regional neurovascular coupling<sup>54</sup>. HDR  
 4 was quantified as the slope of BOLD change per unit increase in the electrophysiological fractional  
 5 occupancy.

6 Figure 4 depicts maps of state-specific BOLD responses time-locked to fMRI frames with non-zero  
 7 fractional occupancy by each of the five salient HMM states. The HDR, evoked by such electrophysiological  
 8 “trigger-frames”, was modeled at each voxel using a gamma response function. The cortical maps show  
 9 (de)activation clusters observed when group statistics were computed while treating participants as a random  
 10 effect, regressing out the effects of age and gender, and correcting for multiple comparisons using simulation  
 11 testing. The upper right panel summarizes shape parameters of the best-fit gamma models for each network  
 12 node. Note that parameters for different nodes in the same network appear more similar to each other than  
 13 those from different networks. After controlling for age/gender, the mean Euclidean pairwise distance between  
 14 ( $\alpha$ ,  $\tau$ ) points, computed for each participant, is shorter within networks than between networks (F=16.86,

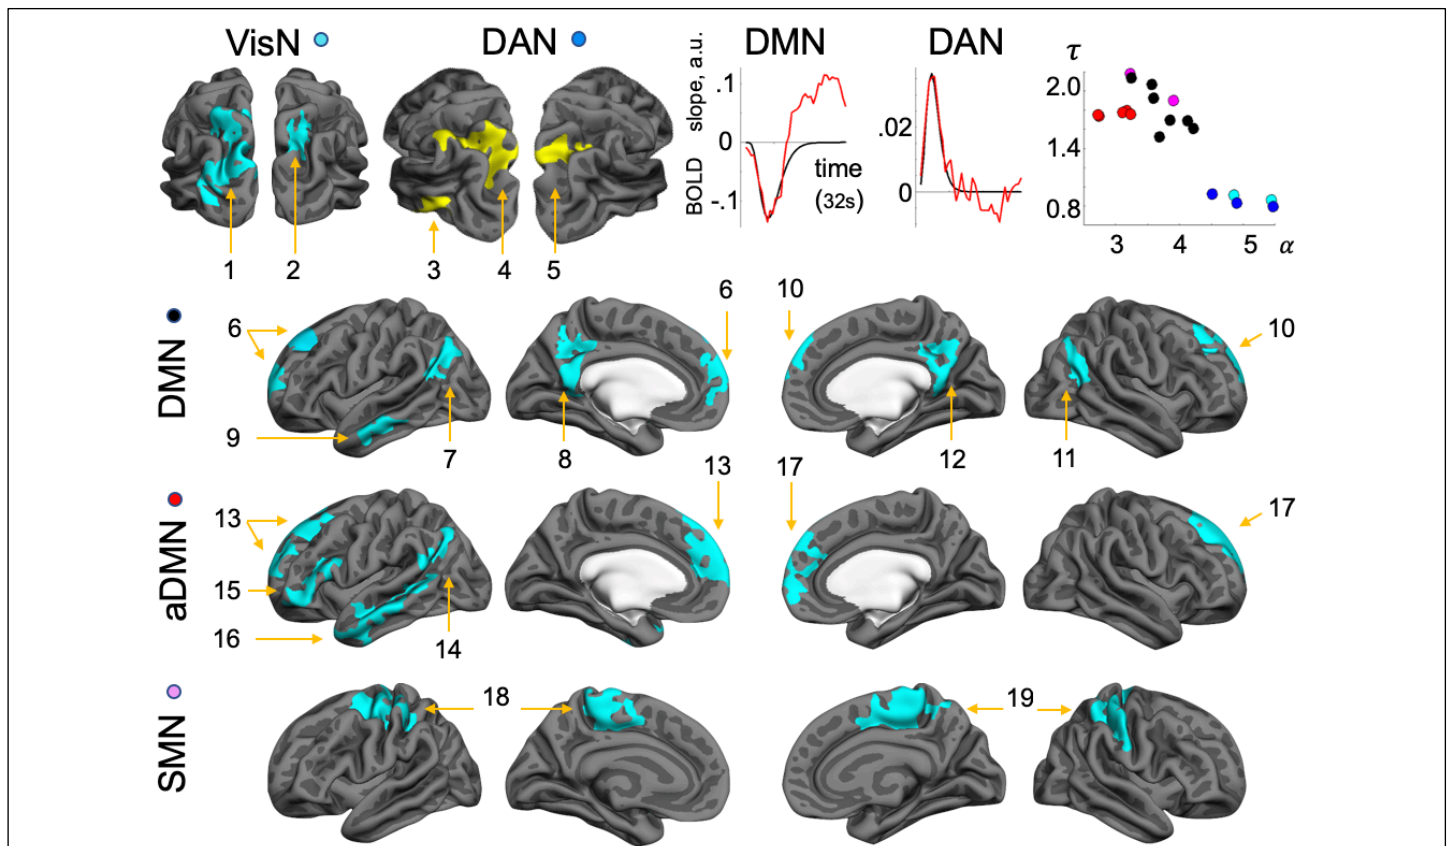

**Figure 4.** Maps of state-specific increases (yellow) and decreases (blue) in BOLD signal time-locked to ‘trigger’ timeframes with non-zero fractional occupancy by electrophysiological HMM states and modeled with a gamma response function. The slope of BOLD change in response to frame-to-frame fractional occupancy variation was estimated in each voxel. Upper right panel from right to left: shape parameters of the fitted gamma models ( $\alpha$ , exponent,  $\tau$ , dispersion) for VisN nodes in cyan, DAN in blue, DMN in black, aDMN in red, and SMN in magenta; graphs for DAN and DMN showing gamma models (black) with overlaid FIR-based BOLD signal estimates for representative nodes averaged across node voxels and participants (red). Numbers of significant clusters ( $p < 0.05$ , corrected) represent: for VisN state, 1, left extrastriate and posterior parietal; 2, right posterior parietal; for DAN state, 3, left posterior temporal; 4 and 5, left and right intraparietal sulci and posterior parietal; for DMN state, 6 and 10, left and right medial/superior frontal; 7 and 11, left and right inferior-parietal; 8 and 12, left and right precuneus/posterior cingulate; 9, left lateral-temporal; for aDMN state, 13 and 17, left and right medial/superior frontal; 14, left inferior-parietal; 15, left lateral prefrontal; 16, left lateral temporal; for SMN state, 18 and 19, left and right sensorimotor and supplementary motor. HMM state name abbreviations are the same as in Figure 2.

1  $p < 0.05$ , Cohen's  $d = 1.31$ ). This holds even though some of the nodes from different networks are proximal in  
 2 the physical brain space (e.g., DMN state: inferior parietal, DAN state: intraparietal). The  $\alpha$  exponent for all  
 3 regions was  $> 2$  – the value commonly used in ‘canonical’ gamma response modeling<sup>22,23</sup>; noteworthy, this  
 4 difference could be caused, in part, by slightly imprecise time-locking to electrophysiological states occurring  
 5 at different times during the 800-ms trigger-frame. As expected based on the cortical topography of state-  
 6 specific electrophysiological activity, the DAN state evoked a BOLD signal increase in bilateral inferior-  
 7 parietal sulci and the posterior-temporal cortex (voxel-wise Cohen's  $d$ s between 0.49 & 1.05). Similarly,  
 8 regions where the BOLD signal was modulated in response to the DMN state corresponded to the  
 9 electrophysiological topography of this state. Nonetheless, these regions, including the inferior-parietal lobe,  
 10 precuneus/posterior cingulate cortex, medial/superior prefrontal cortex, and lateral-temporal cortex, showed an  
 11 evoked BOLD decrease ( $d$ s between 0.51 & 0.97). This reversal in the sign of evoked BOLD changes  
 12 corresponded to the reversal in the sign of electrophysiological amplitude changes—a decreased amplitude in  
 13 the DAN state but increased amplitude in the DMN state (cf., Figure 2). The other states showing enhanced  
 14 electrophysiological amplitudes also displayed spatiotemporally concordant reductions in BOLD signal. The  
 15 VisN state was associated with BOLD reductions in regions of the dorsal visual stream<sup>55</sup> ( $d$ s between 0.48 &  
 16 0.77). The aDMN state was associated with BOLD reductions in the medial, dorsal, and lateral prefrontal  
 17 cortices as well as temporal and inferior parietal regions. The SMN state was associated with BOLD  
 18 reductions in the sensorimotor cortex ( $d$ s between 0.43 & 0.79). Overall, the topography of cortical networks  
 19 in which the BOLD signal was modulated by electrophysiological HMM states corresponded well to previous  
 20 cortical parcellations into large-scale functional networks using variance decomposition techniques<sup>56</sup> applied  
 21 to continuous resting-state BOLD recordings<sup>36</sup>.

22 Figure 5 shows time-courses of BOLD changes evoked by electrophysiological trigger-frames computed  
 23 using a FIR approach<sup>23</sup> without any *a priori* assumptions about HDR shape. For each network node, the values  
 24 at each time-point reflect the average slope of BOLD signal modulation by changes, from trigger-frame to  
 25 trigger-frame, in fractional occupancy of the eliciting electrophysiological HMM state. DAN, VisN, and SMN  
 26 states evoked a monophasic response; after approximately 10 s, the BOLD signal returned to near-baseline  
 27 levels. Noteworthy, for VisN and DAN states, a canonical gamma response function ( $\alpha = 2$ ,  $\tau = 1.25$ ) was well

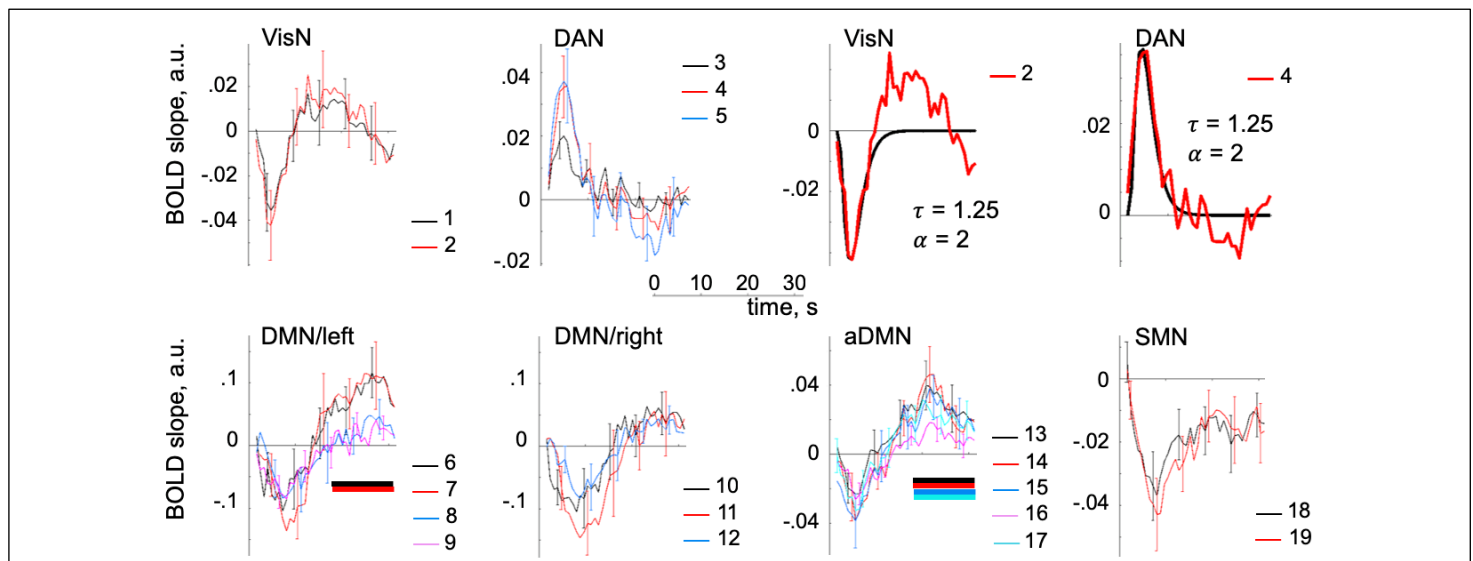

**Figure 5.** Time-courses of state-specific BOLD changes computed using a FIR approach without *a priori* assumptions about HDR shape. The slope of BOLD change per unit increase in fractional occupancy by eliciting electrophysiological network states during the trigger frames was estimated at each fMRI frame during a peri-trigger-frame time interval (time, 0 s, corresponds to the trigger fMRI frame). BOLD time-courses for HMM states were aligned relative to an 8-s pre-trigger-frame baseline and averaged across voxels in each numbered significant cluster in Figure 4 and across participants. Error bars show standard error of the group mean. The upper right panels show that VisN and DAN time-courses could be modeled by a canonical HDR function (black). Colored horizontal bars in the bottom panel indicate the time-courses that were significantly different from baseline during the 16-32-s post-trigger-frame time interval ( $p < 0.05$ ). HMM state name abbreviations and cluster numbers are the same as in Figures 2.

1 suited to model the HDR. We used a statistic indicating the extent of deviation of the observed BOLD time-  
2 courses from both fitted shape-flexible and canonical gamma response models. After controlling for age and  
3 gender, no differences between models were observed in all VisN and DAN nodes ( $F_s < 3.07$ ,  $p_s > 0.1$ ,  
4 uncorrected). In the DMN, increased amplitudes of electrophysiological activity in lower frequencies (4-30  
5 Hz) previously have been linked to higher BOLD levels<sup>57,58</sup>. Thus, the DMN state, characterized by increased  
6 lower-frequency amplitudes, would be expected to evoke a positive BOLD response. We observed a biphasic  
7 BOLD shape in several regions in response to the DMN/aDMN states; after an initial negative-going peak, the  
8 signal displayed a positive-going curve. In the second half of the epoch (16-32 s), the integral of the slope was  
9 significantly higher than baseline in a subset of DMN nodes (change from baseline:  $F=7.21$ ,  $p<0.05$ ,  
10 interaction of change from baseline with node:  $F=3.01$ ,  $p<0.05$ ; follow-up analysis revealed that six time-  
11 courses were higher than baseline; Cohen's  $d_s$  between 0.62 & 0.83). However, in a control analysis for DAN,  
12 VisN, and SMN, such effects were not significant ( $F_s < 1$ ,  $p_s > 0.35$ ).

13 Association between lower-frequency electrophysiological amplitudes and BOLD in the DMN may be  
14 linked to an alert wakeful state<sup>59</sup>. In our study, the temporal pattern of electrophysiological DMN state  
15 dynamics suggested that this network might be closest to criticality -- a high energy state, when the neuronal  
16 resources are maintained at maximal availability for optimal vigilance in the uncertain world<sup>50</sup>. Thus, we  
17 asked whether the steep slopes of late BOLD increase per unit increase in electrophysiological fractional  
18 occupancy, which may reflect energy resources replenished to support future activity<sup>54</sup>, may be inherent to the  
19 DMN state of criticality.

20 We used the integral of the slope during the positive lobe of the DMN HDR curves (shown in Figure 5) as  
21 a metric of positive BOLD responsiveness. After the effects of age and gender were regressed out, this metric  
22 averaged across all seven DMN nodes was associated with the power law fit computed on DMN  
23 electrophysiological lifetimes (i.e., power law deviation statistic shown in Figure 3 multiplied by -1 for easier  
24 interpretation;  $r=0.58$ ,  $p<0.05$ ; follow-up analysis revealed that this result was driven by five nodes). Figure 6  
25 (upper panel) illustrates associations between positive BOLD responsiveness in individual DMN nodes and  
26 the power law fit. Similar results for power law metrics computed on intervals between electrophysiological  
27 states are reported in Supplemental Figure 2. We found no association in control analyses between analogous  
28 BOLD responsiveness metrics for other HDR effects and corresponding state-lifetime-based power law  
29 statistics ( $abs(r)<0.33$ ,  $p>0.22$ ; see Supplemental Discussion for comments on the aDMN), except for the  
30 DAN effect ( $r=-0.58$ ,  $p<0.05$ ). We had no *a priori* hypothesis for the DAN state; if replicated, an association  
31 between high positive BOLD responsiveness and a DAN electrophysiological state, characterized by low  
32 amplitude (i.e., desynchronized) activity deviating from energetically optimal spontaneous patterns, would be  
33 consistent with prior evidence that the DMN and DAN represent alternate regimes of intrinsic brain function<sup>60</sup>.

34 We examined the spatial topography of the association between positive HDR evoked by DMN state and  
35 the power law fit for DMN electrophysiological lifetimes by modeling a voxel-wise gamma response function  
36 with a 12-s delay after state-specific electrophysiological trigger-frames (i.e., an approximate time-point when  
37 the FIR-estimated curves deviated from the fitted gamma model in our primary DMN analysis, Figure 4). In  
38 group analysis, we modelled (1) an interaction between BOLD slope (i.e., BOLD signal change per unit  
39 change in DMN state fractional occupancy) and power law fit as well as (2) expected BOLD slope if the  
40 power law deviation were 0 (i.e., the intercept). The observed activation clusters displayed in the middle panel  
41 of Figure 6 overlapped the classic DMN nodes<sup>60</sup> (even if slightly different from the deactivation clusters in our  
42 primary analysis; see Supplemental Discussion). For the aDMN state, we examined the spatial topography of  
43 the late positive BOLD response. The bottom panel of Figure 6 shows activation clusters observed in a voxel-  
44 wise group analysis of the BOLD slope (per unit change in aDMN state fractional occupancy) modeled with a  
45 delayed gamma response function.

46 **Associations with presumed cerebrovascular white-matter signal abnormalities (WMSA).** We examined  
47 possible cerebrovascular links with positive BOLD responsiveness in the DMN, previously associated with  
48 heightened energy demand<sup>61-63</sup>. The overall volume of WMSA evident in structural MRI data was used as a  
49 surrogate marker of general cerebrovascular decline<sup>64-67</sup>. After the effects of age and gender were regressed  
50 out, positive BOLD responsiveness averaged across all seven DMN nodes was associated with WMSA ( $r=-$   
51 0.64,  $p<0.05$ ; follow-up analysis revealed that this result was driven by five nodes). Figure 7A illustrates the



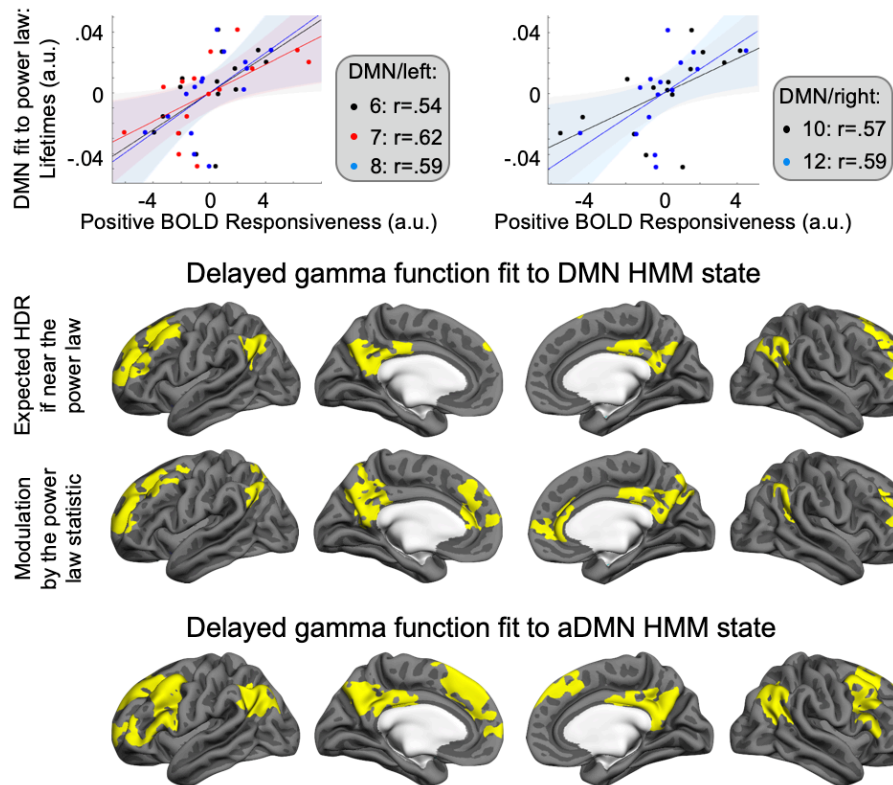

**Figure 6.** Cross-sectional association between positive BOLD responsiveness in the DMN and the temporal structure of DMN electrophysiological activity. In five numbered significant clusters from Figure 4, the integral of the slope of positive BOLD response to DMN-state fractional occupancy variation was correlated with the fit between the PDF of DMN lifetimes and the power law (negative of the deviation statistic in Figure 3); shaded areas show 95% confidence intervals; for all  $r$ -values,  $p < 0.05$  (upper panel). Significant spatial clusters ( $p < 0.05$ , corrected) for the relationship between positive BOLD responsiveness and DMN lifetime-based power law fit (middle panel). Maps of positive BOLD response to DMN state if deviation of DMN lifetimes from the power law were 0 are shown in the upper row, and of an interaction between the positive BOLD effect and the DMN power law fit are shown in the lower row. Maps of positive BOLD response evoked by aDMN state ( $p < 0.05$ , corrected) shown for comparison (bottom panel). The slope of BOLD change in response to frame-to-frame fractional occupancy variation was modeled with a 12-s delayed gamma response function.

- 1 relationship between WMSA volumes and positive BOLD responsiveness in DMN nodes. In additional
- 2 analyses, correlation of WMSA with DMN electrophysiological power law fit was not significant for the
- 3 lifetimes-based metric ( $r = -0.09$ ,  $P > 0.7$ ) but was present for the intervals-based metric (Supplemental Figure
- 4 2).
- 5 **Associations with memory.** The DMN is consistently implicated in episodic memory<sup>68</sup>. Because criticality is

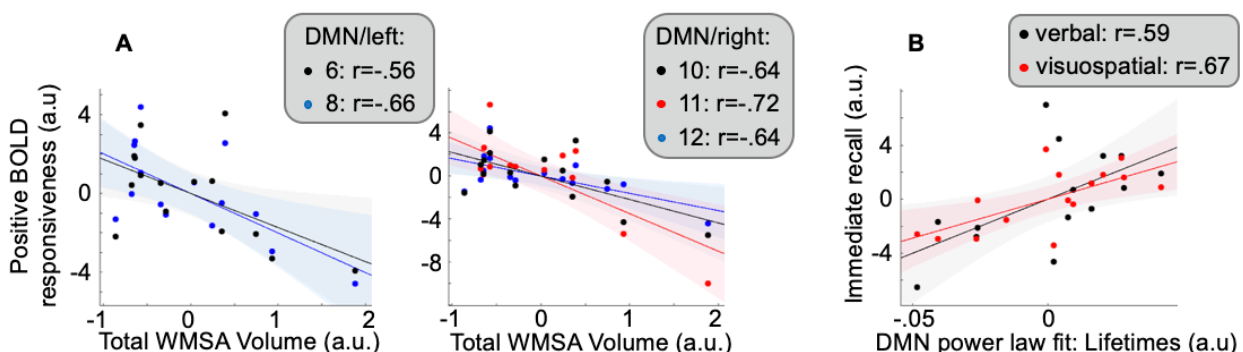

**Figure 7.** Cross-sectional associations between total WMSA volume and positive BOLD responsiveness in the DMN (A) and between DMN power law fit estimated based on lifetimes and immediate episodic memory recall (B). Shaded areas, 95% confidence bounds; for all  $r$ -values,  $p < 0.05$ . Node numbers correspond to significant clusters in Figure 4.

1 the state of optimal cognitive readiness<sup>69,70</sup>, we reasoned that participants who display patterns of DMN  
2 coordinated electrophysiological activity particularly suggestive of criticality may show advantage in forming  
3 episodic memories. Indeed, scaling of neural lifetimes has been linked to behavioral parameters<sup>46</sup>. Figure 7B  
4 illustrates the relationship between power law fit computed based on DMN lifetimes (i.e., a metric of  
5 criticality) and performance in immediate recall trials for verbal (Wechsler Logical Memory I, WLM-I<sup>71</sup>) and  
6 visuospatial (Brief Visuospatial Memory Test, BVMT<sup>72</sup>) memories. After the effects of age and gender were  
7 regressed out, the power law fit was associated with the summed normalized WLM-I and BVMT scores  
8 ( $r=0.65$ ,  $p<0.05$ ; follow-up analysis confirmed the association for both verbal and visuospatial recall). These  
9 measures of memory were not associated with DMN positive BOLD responsiveness ( $r<0.42$ ,  $p>0.12$ ).

## 11 Discussion

12 Using a novel study paradigm, EEG and fMRI data, simultaneously acquired during a resting scan, were  
13 analyzed to infer the time-courses of coordinated electrophysiological shifts in large-scale brain networks and  
14 to estimate network-specific shapes of the HDR time-locked to changing rates of electrophysiological events.  
15 An HMM approach was used to infer sequential transitions between several underlying network states in  
16 fluctuating high-density EEG source-localized to 38 regions covering the entire cortex. These transient states  
17 represented discrete spatial patterns of coordinated intrinsic electrophysiological activity lasting only a  
18 fraction of a second but recurring in a rapid, irregular succession. In a sample of older adults, inferred  
19 electrophysiological states reproduced main spatial and temporal parameters of MEG-based states previously  
20 described using similar methodology in younger<sup>14,15</sup> and older adults<sup>16</sup>. In an event-related analysis of rapidly  
21 acquired fMRI, we leveraged the varying amounts of time spent in a given electrophysiological network state  
22 during different 800-ms recording frames. Using GLM, we deconvolved HDR patterns associated with  
23 temporal variations in fractional occupancy of electrophysiological activity in different networks. Spatially,  
24 HDR patterns observed in older adults corresponded to both maps of eliciting electrophysiological network  
25 states and classic functional networks described in prior fMRI studies<sup>31–36</sup>. Temporally, HDR patterns showed  
26 varying network-specific shapes ranging from predominantly monophasic to biphasic. These findings  
27 describe, for the first time, how the rapid stream of spatial coordinated changes in spontaneous  
28 electrophysiological activity relates to the morphology of local HDR—building a conceptual and  
29 methodological framework for future research on the interplay between vascular and neural dynamics in the  
30 human brain. These results also inform inferences about neural activity in older adults based on  
31 complementary information provided by EEG and fMRI.

32 The DMN, which is susceptible to aging and neurodegenerative disease<sup>27</sup>, showed electrophysiological  
33 and HDR signatures remarkably dissimilar from those of the DAN, a less vulnerable higher-order cognitive  
34 system<sup>28,29</sup>. The DMN functional state was characterized by increased amplitudes of 4-30-Hz band-limited  
35 electrophysiological activity, temporal parameters scaled according to a power law, and a negative-to-positive  
36 biphasic HDR. By contrast, the DAN functional state was marked by decreased electrophysiological  
37 amplitudes, temporal parameters substantially deviating from the power law, and a monophasic positive HDR.  
38 General cerebrovascular health of older non-demented adults, estimated based on signal abnormalities in  
39 structural MRI scans, predicted how steep the slopes of the positive BOLD change in response to increased  
40 coordinated electrophysiological activity were in the DMN. This positive BOLD responsiveness was  
41 associated with individual differences in the temporal structure of electrophysiological DMN state dynamics  
42 linked to memory decline. These results offer new insights into potential origins of DMN functional  
43 vulnerability in aging. In this network, which may be at the heart of neural communication across the brain<sup>73–  
44 77</sup>, neurovascular coupling may play a unique role in regulation of intrinsic neural activity.

45 The current investigation exploited high-density EEG, which may have been instrumental to attaining  
46 signal localization to cortical regions sufficiently accurate to replicate previous HMM-based pattern  
47 decomposition of MEG data<sup>16,78</sup>. Whereas EEG consistently achieves as high temporal resolution as MEG, the  
48 present investigation is one of a relatively small subset of studies in which high-density EEG afforded good  
49 spatial resolution<sup>79–81</sup>. In fact, EEG sensitivity to both radial and tangential electrical currents in the cerebral  
50 cortex—superior to the mere radial current sensitivity of MEG<sup>82,83</sup>—may have yielded an enhanced signal,

1 improving HMM performance. Our analysis differentiated between two states: a DMN state with a cortical  
2 map overlapping classic DMN nodes<sup>32,84,85</sup>, including the precuneus, and an aDMN state that was previously  
3 linked to self-referential thought<sup>41</sup>. In our prior studies in younger and older adults, based on source-localized  
4 MEG, HMM did not distinguish between these two states or identify state-specific changes in the  
5 precuneus<sup>14,16</sup>. Only after an additional parameter—phase-locking of electrophysiological activity—was taken  
6 into consideration were similar effects detected in an MEG dataset<sup>15</sup>. Altogether, our data suggest that high-  
7 density EEG, even when recorded during an fMRI scan, is an effective tool for imaging rapid  
8 electrophysiological dynamics in core large-scale functional networks in older adults.

9 Several previous studies in younger participants show temporal associations between features of EEG and  
10 fMRI data recorded simultaneously during a resting scan<sup>17–19,57,86</sup>. Based on the premise that each transient  
11 electrophysiological change evokes a local HDR, these analyses show temporal correlations between BOLD  
12 time-courses as expected based on unique components of EEG activity convolved with a canonical HDR  
13 function and actual BOLD fluctuations in distinct brain networks recorded by fMRI<sup>17–19</sup>. Our study design  
14 built upon this evidence and took several steps forward. First, by relying on a well-validated HMM application  
15 to electrophysiological source-localized data<sup>14–16</sup>, we did not merely establish temporal concordance but were  
16 able to predict specific brain areas in which each electrophysiological spatiotemporal pattern would evoke an  
17 HDR. Although source-localized EEG is characterized by limited spatial resolution and inherent ambiguity  
18 due to the inverse problem<sup>87,88</sup>, spatial correspondence between EEG and fMRI effects was readily apparent.  
19 Second, we modeled HDR evoked by network-specific electrophysiological activity without any *a priori*  
20 assumptions about its shape. Such an analysis permitted—for the first time—quantification of the HDR time-  
21 course for higher-order cognitive networks, which previously was not possible due to a lack of information  
22 about the neurophysiological timing of cognitive events. Third, we estimated the slope of BOLD change in  
23 response to timeframe-to-timeframe variation in fractional occupancy by electrophysiological network  
24 activity, which may be a promising metric of individual differences in neurovascular coupling. Such  
25 specialized measurement of the BOLD mechanism would be valuable for disambiguating between  
26 neurophysiological and neurovascular effects in studies of aging and neurodegenerative disorders<sup>89</sup>, especially  
27 since electrophysiology and fMRI have been shown to carry additive information about brain health<sup>90</sup>.  
28 Previously, small participant samples were sufficient to infer robust HMM states<sup>14,16</sup> that were subsequently  
29 reproduced in larger datasets<sup>91</sup>. In the present study, we observed distinct BOLD signatures of HMM states in  
30 a relatively small participant sample. Although replication is needed, this result underscores that the HMM  
31 pattern-decomposition approach is a promising tool for developing future sensitive brain diagnostics.

32 In “task-positive” functional networks—generally known to show increased BOLD signal in response to  
33 cognitive loads<sup>60</sup>, our resting-state analysis revealed a monophasic HDR, but changes from baseline were of  
34 different polarities. Initially, we utilized a gamma response function to model BOLD responses in the entire  
35 cortex. The obtained HDR maps showed clear spatial correspondence to maps of temporally concordant  
36 electrophysiological states. To estimate the HDR time-course without *a priori* assumptions about its shape, we  
37 used FIR basis functions<sup>23</sup>. Previously, the shape of what is now considered a “canonical” HDR was described  
38 based on an obligatory primary sensory response in the visual cortex<sup>20–23</sup>. In our older adult participants, the  
39 shape of the HDR to intrinsic synchronized electrophysiological changes in the VisN and DAN was similar to  
40 the canonical shape. In the context of prior carefully designed studies showing a preserved canonical HDR in  
41 normal aging<sup>92–94</sup>, this finding validates our novel event-related paradigm for analysis of concurrent  
42 electrophysiological/BOLD data. In the intraparietal sulcus, which has been linked to shifts in top-down  
43 attention<sup>95–97</sup>, our estimate of HDR shape in older adults can benefit future fMRI studies with regard to the  
44 interpretation of the timing of evoked neural activity. Remarkably, the sign of BOLD change from baseline  
45 relative to the sign of spatiotemporally concordant change in electrophysiological amplitudes in our study is  
46 consistent with prior evidence. Previously, a negative temporal correlation was found between BOLD signal  
47 intensity and amplitude variations in lower frequency (4–30 Hz) electrophysiological activity across trials in  
48 task-related designs<sup>98–101</sup> and across spontaneous fluctuations during resting-state recordings<sup>57</sup>. Similarly, in  
49 our study, the DAN state, characterized by reduced electrophysiological amplitudes in the 4–30 Hz band,  
50 evoked a positive HDR, whereas the VisN and SMN states, characterized by increased electrophysiological  
51 amplitudes, evoked a negative HDR.

1 A distinctive pattern of a biphasic HDR was evoked by DMN/aDMN electrophysiological states.  
2 Modeling the cortical HDR to each state by fitting a gamma response function was adequate to detect  
3 significant changes in regions matching classic DMN nodes<sup>32,35</sup>. Nonetheless, in several nodes, estimation  
4 without *a priori* shape assumptions, using a FIR basis set, revealed an initial BOLD reduction followed by a  
5 BOLD increase. In previous concurrent EEG/fMRI recordings at rest, DMN patterns were inconsistent,  
6 ranging from no electrophysiological states correlated with DMN BOLD fluctuations<sup>18</sup> to separate positive  
7 and negative temporal correlations of distinct transient electrophysiological states to the BOLD signal in  
8 subsets of DMN nodes<sup>17,19</sup>. Such inconsistent results could occur if the modeled BOLD time-courses obtained  
9 by convolving EEG events with a monophasic HDR function were evaluated against the actual time-courses  
10 where the electrophysiological events evoked a biphasic BOLD response. The distinct HDR shapes evoked by  
11 intrinsic DMN activity may also explain limitations of the HMM in describing dynamics in fMRI-based  
12 functional connectivity<sup>102</sup>, where network-specific time-variable HDR properties can make state transitions  
13 appear less sharp. We consider possible reasons for the biphasic HDR in the Supplemental Discussion.

14 The DMN is implicated in higher-order cognition, and its nodes overlap hubs of intrinsic brain  
15 activity<sup>74,84,103</sup>. It is also one of the most metabolically active networks in the resting brain, showing elevated  
16 levels of cerebral blood flow (CBF)<sup>61,62</sup> and glucose metabolism<sup>63</sup> relative to other brain regions. As a result of  
17 this intense demand, the health of this network is likely reliant on adaptations in neurovascular interactions,  
18 such as the high energy state of criticality. At criticality, neuronal resources may be maintained at maximum  
19 availability for optimal information processing<sup>46,50,104</sup>, and the arising unique patterns of spontaneous  
20 activity<sup>105</sup> with parameters scaled according to power law<sup>51</sup> may be regulated by the pace of cellular resource  
21 replenishment<sup>106–108</sup>. Power law scaling was previously observed even in large-scale measurements of  
22 spontaneous electrophysiological activity from cell populations<sup>44–47</sup>. In our study, to describe temporal  
23 structure of activity in electrophysiologically defined networks, we estimated how much scaling of HMM state  
24 parameters deviates from power law. The DMN temporal patterns showed one of the smallest deviations from  
25 the power law among electrophysiological states. Across participants, the proximity of the DMN state  
26 lifetimes to the power law and thus, presumed criticality, predicted mental readiness to engage in episodic  
27 memory encoding as was suggested by superior immediate recall of verbal and visuospatial information. Self-  
28 regulation of the criticality regime may arise from slow built-up of energy after its dissipation by activity<sup>109</sup>.  
29 Besides, transient network activations may be phase-locked to ultra-slow spontaneous waves, evident in the  
30 electrophysiological and fMRI recordings, which have been suggested to reflect cortical excitability<sup>16,110,111</sup>.  
31 To examine the link between cerebrovascular support regulation, which may enable energy built-up, and  
32 DMN electrophysiological state patterns, we used positive BOLD responsiveness to DMN  
33 electrophysiological states. A cerebrovascular health contribution to this DMN metric was suggested by its  
34 cross-sectional inverse association with WMSA burden, a surrogate marker of general cerebrovascular  
35 decline<sup>112</sup>. Our results revealed a strong association of positive BOLD responsiveness in DMN nodes with the  
36 DMN power law fit metrics for inter-state intervals and state lifetimes that—in whole-cortex-wise analysis—  
37 was confirmed to selectively localize to the DMN network. Thus, HDR regulation to variable rates of  
38 spontaneous electrophysiological activity in the DMN may be linked to sustaining the optimal functional  
39 regime near criticality.

40 Overall, our findings suggest that classic functional brain networks are characterized not only by their  
41 spontaneous neural activity patterns, but also by their HDR shape signatures. Remarkably, HDR shapes were  
42 highly similar within functional networks, even when considerable differences existed between networks. In  
43 future research, it will be important to gain a better understanding of how the HDR, which faithfully follows  
44 coordinated changes in spontaneous electrophysiological activity, might adapt to the properties of unique  
45 neural networks. Interestingly, it has been shown that slower timescales of neural activity may characterize  
46 brain regions with larger numbers of connections<sup>113</sup>, perhaps because such regions may integrate more  
47 information. It may be that HDR has adapted to optimally support such functional differences among  
48 networks. Our study describes the BOLD response to changes in the rate of network-specific lower-frequency  
49 electrophysiological activity but was not designed to measure high-frequency gamma bursts (30-90 Hz).  
50 Methodological difficulties in discerning gamma activity in the presence of high frequency recording noise  
51 can be overcome by employing interleaved EEG/fMRI designs<sup>114</sup> and specialized HMM analyses<sup>115</sup>. Gamma

1 activity is linked to high metabolic demand<sup>116</sup> and may impact how unique patterns of cross-frequency<sup>117–121</sup>  
2 and cross-cortical-layer<sup>114,122–124</sup> integration during electrophysiological network states are coupled with the  
3 HDR. Another methodological advance would involve concurrent EEG recording within BOLD/CBF  
4 measurement designs that can estimate oxygen consumption<sup>125</sup>. In our study, electrophysiological states in  
5 sensory/motor networks evoked negative-going BOLD responses. Although the magnitude of these responses  
6 did not relate to overall temporal electrophysiological patterns as quantified by the power law fit of their  
7 parameter PDFs, it is interesting to consider a potential role of such activity states in reducing the cost of brain  
8 function during resting state. For instance, with limited sensory input during rest, sensory networks may  
9 undergo brief states of lowered metabolic demand (i.e., simultaneous reductions in oxygen consumption and  
10 CBF)<sup>126</sup> or reduced metabolic-vascular coupling (i.e., reduced CBF relative to oxygen consumption)<sup>127</sup>. Our  
11 study used short (800-ms) BOLD recording frames to capture the fastest neurovascular dynamics possible  
12 while safely recording EEG/fMRI in older participants. Nonetheless, electrophysiological HMM states exhibit  
13 a slower temporal structure (i.e., quasiperiodic reoccurrence rate fluctuations  $<0.1$  Hz)<sup>14,16</sup>, where transient  
14 states of coordinated network activity are embedded into the phase of ultra-slow fluctuations, likely, related to  
15 changing cortical excitability<sup>111</sup>. Simultaneous BOLD/CBF designs can take advantage of this slow structure  
16 while recording data in longer (2-s) frames.

17 In summary, in a novel analysis of concurrent EEG/fMRI, we observed a readily apparent spatiotemporal  
18 correspondence between electrophysiological and hemodynamic fluctuations in spontaneous brain activity in  
19 older adults. The brain at rest exhibited an ongoing stream of network-specific electrophysiological changes,  
20 with each network displaying unique features of neurovascular coupling. Whereas VisN and DAN  
21 electrophysiological states evoked a near-canonical HDR shape, establishing the validity of our analysis, the  
22 DMN state showed a unique negative-to-positive biphasic HDR. Importantly, lower positive BOLD  
23 responsiveness in the DMN across our sample of older adults was predicted by deteriorating cerebrovascular  
24 health and associated with disruptions in the natural temporal pattern of DMN electrophysiological activity  
25 linked to memory decline. If future work verifies that temporal parameters of fast natural activity, which may  
26 be protective against Alzheimer's pathology<sup>128</sup>, are regulated by neurometabolic or neurovascular coupling, it  
27 may be possible to deliver preventive treatments through innovative technologies such as near-infrared  
28 light<sup>129</sup>. Future research delineating diagnostic procedures for HDR dysregulation could lead to the design of  
29 optimal light treatment schedules to enhance mitochondrial and vascular function by targeting specific layers  
30 and cell types in the cerebral cortex<sup>114,130</sup>.

## 31 **Methods**

32 **Participants.** Fifteen older adults were recruited to take part in this study through the Brain Aging and  
33 Dementia Laboratory at Massachusetts General Hospital from a local longitudinal cohort or through  
34 community outreach. Individuals were non-demented with Mini-Mental State Examination scores  $>24$ .  
35 Because we primarily aimed to study DMN and DAN, we estimated the sample size we would need based on  
36 previous findings of a rather large effect size (Cohen's  $d$  between 0.7–0.9; N.B.,  $d=t/\sqrt{n}$ ) in fMRI-based  
37 within-subject comparisons in these networks<sup>131,132</sup>. Because we aimed to study the fMRI signal associated  
38 with changes in the electrophysiological neural activity, we expected smaller error variance than in prior  
39 studies where the measurement error might have been influenced by trial-to-trial variation in the neural  
40 response to cognitive stimulation. Thus, we aimed to detect an effect size of at least 0.8 (one-sample, two-  
41 tailed t-test), which would require 15 participants to have 80% power or greater at a 0.05 level of  
42 significance<sup>133</sup>. Additionally, we aimed to test targeted hypotheses about specific cross-sectional associations  
43 (e.g., between the neurally-evoked HDR and a surrogate marker of the global cerebrovascular health). We  
44 anticipated that we would have 80% power to detect a strong correlation of 0.61 or greater at a 0.05 level of  
45 significance (one-tailed) with 15 participants<sup>134</sup>. We excluded participants for significant health concerns that  
46 would prevent participation or would be likely to confound study results. These conditions included major  
47 neurological or psychiatric disorders (e.g., Parkinson's disease, Huntington's disease, vascular dementia,  
48 clinical stroke, brain surgery, psychosis, severe major depression, and moderate to severe traumatic brain  
49 injury) or any substantial systemic illness. All individuals had at least a high school education (i.e., 12 years).  
50

1 The local Institutional Review Board approved this project, and informed consent was obtained from each  
2 participant. Participant demographic characteristics and cognitive/functional assessment scores are provided in  
3 Table 1.  
4

5 **Table 1.** Demographic and clinical characteristics of study participants.

| Assessment         | Mean±std   |
|--------------------|------------|
| Age                | 72.60±6.96 |
| Gender             | 7 males    |
| Years of education | 15.80±3.00 |
| MMSE               | 27.87±1.68 |
| MoCA               | 24.13±3.91 |

6  
7 Note: MMSE, Mini-Mental State Examination; MoCA, Montreal Cognitive Assessment, std, standard  
8 deviation.

9 **Data acquisition.** Imaging was conducted with a Siemens Prisma 3-Tesla whole-body MR scanner (Siemens  
10 Medical Systems) using a 32-channel head coil. High-resolution scanning protocols developed by the Human  
11 Connectome Project<sup>135</sup> were employed in both structural MRI (T1-weighted multi-echo magnetization-  
12 prepared rapid gradient echo; voxel size, 0.8 mm<sup>3</sup>; field of view, 256×240×166; TR/TI=2500/1000;  
13 TE=1.8/3.6/5.4/7.2; flip angle, 8°) and fMRI (two 10-min-long consecutive resting-state T2\*-weighted scans  
14 sensitive to BOLD contrast: 2.0-mm isotropic voxels covering the whole brain [72 oblique-axial slices] were  
15 acquired with a 2D multiband [MB] gradient-recalled echo echo-planar imaging sequence; MB8;  
16 TR/TE=800/37 ms; flip angle, 52°). EEG (filter, 0.01-200 Hz; sampling rate, 1000 Hz) from a 256-channel net  
17 included in an MR-compatible Geodesic 410 MR System (Electrical Geodesics, Inc., [EGI], a Philips  
18 company) was acquired concurrently with fMRI. EEG sampling was temporally aligned to MR gradient  
19 artifacts using the scanner's 10-MHz clock, and triggers marking each fMRI recording frame, and thus artifact  
20 onsets, were recorded by the EEG system. EEG channels directly below and to the side of each eye were used  
21 to track the electrooculogram to identify epochs containing artifacts due to vertical and horizontal eye  
22 movements or blinks. For ballistocardiogram artifact removal, electrocardiogram (ECG) was acquired using  
23 two MR-compatible ECG leads (InVivo Corp.) placed on the chest. Participants were instructed to keep their  
24 eyes open during resting functional scans and refrain from motion. Structural images of each participant were  
25 registered to the MNI152 standard brain to allow subsequent EEG source space analyses in MNI space.  
26 Locations of EEG sensors with respect to anatomy were determined by registering head surface sensor  
27 positions, digitized using GPS Photogrammetry (EGI), to the head surface extracted from structural MRI.

28 **Analysis tools.** Software packages used in data analysis included FSL<sup>136</sup>, SPM12<sup>137</sup>, Fieldtrip<sup>138</sup>, AFNI  
29 (<https://afni.nimh.nih.gov/>), and FreeSurfer<sup>139,140</sup>. Sample MATLAB (The MathWorks Inc., Natick, MA)  
30 scripts utilized for EEG analysis can be found at <https://www.psych.ox.ac.uk/research/ohba-analysis-group>.  
31 Scripts used for event-related fMRI analysis are included in the FreeSurfer Functional Analysis Stream -  
32 FSFAST (<https://surfer.nmr.mgh.harvard.edu/fswiki/FsFast>).

33 **Pre-processing of EEG data.** Gradient switching artifacts were removed using a 10-sample moving average  
34 subtraction, and ballistocardiogram artifacts were reduced using optimal basis sets<sup>141</sup> implemented in  
35 NetStation (Electrical Geodesics, Inc.). Each EEG recording was then visually inspected to identify channels  
36 and/or time-intervals of data containing obvious artifacts (e.g., extremely high variance), which were  
37 discarded. Residual cardiac and ocular artifacts were removed by Independent Component Analysis (ICA).  
38 Following artifact cleaning, EEG data were converted to SPM12<sup>137</sup>, frequency filtered into a 4-30 Hz band—  
39 carrying most information about brain health<sup>142</sup> and characterized by a relatively high signal-to-noise ratio in  
40 electrophysiological recordings<sup>143</sup>, and downsampled to 200 Hz.

1 **Electrophysiological time-courses in the source space.** Forward modeling used a Boundary Element  
2 Model<sup>144</sup> with scalp, skull, and brain surface reconstructions. A linearly constrained minimum variance scalar  
3 beamformer, implemented in SPM12, was used to project band-limited EEG data onto a regular 8-mm grid  
4 spanning the entire brain<sup>145–147</sup>. Beamforming provides verifiable neural source estimates and effectively  
5 rejects interference from non-brain sources in the electrophysiological signal<sup>148,149</sup>. Projected data were scaled  
6 by an estimate of projected noise to account for variations in the sensitivity of the beamformer at different  
7 brain locations<sup>145,146</sup>.

8 Thirty-eight anatomical regions of interest (ROIs) were selected based on a group spatial ICA of fMRI  
9 resting recordings from the first 200 participants in the Human Connectome Project database<sup>150</sup>. This same set  
10 of ROIs was previously used in network analyses based on resting state MEG<sup>30,151</sup>. Regional time-courses  
11 were obtained based on projected band-limited EEG data using principal component analysis of voxel time-  
12 courses within each ROI, normalized so that the positive peak had a height of unity in all regions. The time-  
13 course for an ROI was represented by coefficients of the principal component accounting for the most  
14 variance, weighted by the strength of the ICA spatial map. Activity with zero phase-lag, which likely contains  
15 “signal/spatial leakage” to multiple EEG sensors and may lead to inflated connectivity estimates, was  
16 accounted for by symmetrically orthogonalizing all ROI time-courses simultaneously<sup>30</sup>. Multivariate  
17 symmetric orthogonalization<sup>152,153</sup> produces a unique solution that is unaffected by reordering of ROIs and  
18 constitutes an optimal set of mutually orthogonal ROI time-courses that are minimally displaced from the  
19 uncorrected original time-courses (as measured by least-squares distance). By being multivariate, this method  
20 can also account for any spurious associations inherited from true connections, also known as “ghost  
21 interactions”<sup>30,154</sup>.

22 Following leakage reduction, the amplitude envelope of the electrophysiological band-limited activity for  
23 each ROI time-course was derived by taking the absolute value of its Hilbert transform and downsampling to  
24 40 Hz<sup>155</sup>. These time-courses of oscillatory amplitude fluctuations were demeaned and normalized by global  
25 (i.e., over all voxels) variance and then concatenated temporally across all participants.

26 **HMM.** Utility of HMM in describing the neural network dynamics has been highlighted<sup>16</sup>, and HMM  
27 inference was conducted using previously described computations<sup>14</sup>. An HMM with 10 states was inferred  
28 based on the time-courses of band-limited electrophysiological amplitudes from 38 ROIs concatenated across  
29 all participants. Previously, we successfully used a 10-state HMM in a sample of older adults<sup>16</sup>, and in an  
30 HMM analysis comparing models with 3-12 states, free energy estimates exhibited a floor effect at 10  
31 states<sup>156</sup>. Additional HMMs with 12 and 14 states yielded similar core results.

32 The HMM infers transient states in which coordinated changes in electrophysiological amplitude recur in a  
33 distinct set of brain regions as well as a time-course for each state. Individual HMM states were defined by a  
34 unique multivariate normal distribution over the ROIs (i.e., mean vector  $[M \times 1]$  and covariance matrix  $[M \times M]$ ,  
35 where  $M=38$ , the number of ROIs)<sup>157</sup>. Previously, we showed that this relatively simple observation model of  
36 multiple HMM states can describe rich spatiotemporal dynamics in the living brain<sup>16</sup>. To account for  
37 variability in HMM inference due to different initializations, 10 realizations were performed, and the model  
38 with the lowest free energy was selected. The Viterbi algorithm was applied to identify the most probable state  
39 at a given time point<sup>157</sup>. Time-courses for each state were constructed as indicator variables specifying time  
40 intervals when the state is most probable.

41 **Spatial maps of electrophysiological states.** Anatomical regions exhibiting state-specific activity (i.e.,  
42 changes in electrophysiological amplitudes during an HMM state relative to the average over time) were  
43 mapped by computing partial correlations within the GLM framework<sup>14</sup>. In all GLM analyses, we employed a  
44 design matrix ( $T \times K$ ), where  $K$  is the number of states and each of the  $K$  columns is a state time-course with  $T$   
45 time-points<sup>158,159</sup>. For each participant at each of the 38 *a priori* ROIs, multiple linear regression was  
46 performed with the time-course of electrophysiological activity as the dependent variable. Prior to GLM, both  
47 the design matrix and ROI data were normalized to have zero mean and unit variance. Estimates of partial  
48 correlation coefficients between each state and ROI data yielded a set of  $K$  spatial maps. These maps were  
49 averaged across participants and visualized on the cerebral cortex.

1 **Temporal dynamics of electrophysiologically defined networks.** For the purpose of computing temporal  
2 metrics, states were classified as being on or off by choosing the most probable state at each time point (i.e.,  
3 Viterbi path). Lifetimes of inferred HMM states were defined as the amounts of time spent in each state before  
4 transitioning out of that state. Intervals between network activity states were defined as the amounts of time  
5 between consecutive occurrences of a given HMM state. A PDF was used to describe likelihood of different  
6 lifetime/interval values during the recording period. To quantify temporal structure of coordinated activity in  
7 each network, we computed a Kolmogorov-Smirnov (KS) statistic indicating the degree to which a PDF of the  
8 lifetimes in each state deviates from a modeled power law distribution. Similar metrics were also obtained for  
9 intervals between network activity states. Specifically, the KS statistic reflects the difference between the  
10 empirical PDF and a model power law PDF fitted to the data using maximum likelihood estimation<sup>52</sup>. To  
11 examine differences between DMN/aDMN states and the comparison DAN state, we used an omnibus  
12 rmANOVA with state as a factor (DMN, aDMN, and DAN) and deviation from power law as a dependent  
13 variable, while regressing out the effects of age and gender. Huynh and Feldt correction was applied to  
14 repeated measures with >1 degree of freedom<sup>160</sup>, and the effect size in follow-up simple comparisons was  
15 quantified using Cohen's  $d$ <sup>161</sup>.

16 **Pre-processing of fMRI data.** The first ten volumes of each functional run were discarded to allow for T1-  
17 equilibration effects. To correct for motion, all volumes in each run were aligned to a single volume chosen  
18 from the middle of the run using the AFNI algorithm. For each participant, these middle-run volumes were  
19 then aligned to 3D structural images using a combination of automated procedures from FSL/FLIRT and  
20 FreeSurfer/bbregister. Brain mask was created using FSL's BET. Structural images were also used to  
21 construct two-dimensional (2D) models of individual cortical surfaces using FreeSurfer algorithms. Both 3D  
22 and 2D structural models were registered to an average template—a model of brain volume and surface based  
23 on an independent sample of 40 adults registered to the Montreal Neurological Institute atlas (MNI305).  
24 Intensity-normalized functional time series were resampled to the surface-based average template and  
25 smoothed with a 5-mm full width half-maximum Gaussian kernel.

26 **Maps and time-courses of HDR evoked by electrophysiological network states.** fMRI data were analyzed  
27 under GLM assumptions. Our aim was (1) to identify voxels where the BOLD signal was modulated  
28 following changes in the occurrence rate of each electrophysiological HMM state and (2) to describe the state-  
29 specific shapes of such BOLD signal changes. In principle, the fMRI analysis was similar to that used to  
30 derive electrophysiological spatial maps of HMM states. However, state time-courses were modified by  
31 computing fractional occupancy (i.e. proportion of time spent) in a given electrophysiological state during  
32 each 800-ms fMRI recording frame (Figure 1). We used two different approaches to estimate the state-specific  
33 HDR. First, the BOLD response, following trigger timeframes with non-zero fractional occupancy by each  
34 HMM state, was modeled at each cortical voxel using a gamma response function. Participant-specific  
35 statistical models removed low-frequency drifts in the data, regressed out head motion artifacts, and estimated  
36 the slope of BOLD change in response to changes in fractional occupancy by each state (parametric  
37 modulation by a continuous variable). Group statistics were computed treating participants as a random effect,  
38 regressing out the effects of age and gender, and correcting for multiple comparisons using simulation testing.  
39 We determined the likelihood that an activation cluster of the observed size ( $p < 0.05$ , uncorrected, in each  
40 adjacent voxel) could occur by chance by running 10,000 Monte Carlo simulations of synthesized white  
41 Gaussian noise using parameters of the functional analysis. We report Cohen's  $d$  ranges across voxels in each  
42 network, while excluding outliers in the top/bottom 10% of voxels. The second approach included an ROI  
43 analysis employing a FIR model. For each participant, unbiased estimates of BOLD signal slope at 50  
44 consecutive MRI frames time-locked to trigger frames with non-zero fractional occupancy by each  
45 electrophysiological state were obtained without making *a priori* assumptions about HDR shape. For each  
46 ROI, we calculated a BOLD slope time-course by averaging across included voxels at each time-point.

47 These two analysis approaches were applied iteratively. Our initial whole-cortex analysis was based on a  
48 canonical gamma response function ( $\alpha=2$ ,  $\tau=1.25$ ). For each significant cluster observed in this whole-cortex  
49 analysis, we defined a circular ROI (5-mm diameter) around the peak BOLD change and estimated the state-  
50 specific BOLD response time-courses in these ROIs by applying the FIR approach. The optimal gamma  
51 response function, fitting each BOLD time-course, was determined using maximum likelihood estimation, and



1 the revised gamma function parameters ( $\alpha$ ,  $\tau$ ) were used to generate final cortical maps of the state-specific  
2 HDR. Significant clusters ( $p < 0.05$ , corrected, while taking into account initial and final gamma fit analyses)  
3 were displayed on the inflated average template of the cortical surface. These significant clusters in their  
4 entirety were used as ROIs to estimate final state-specific BOLD time-courses in the FIR approach. To  
5 estimate how similar/different the optimal gamma function parameters were between the nodes  
6 within/between different networks, we used an omnibus rmANOVA with a factor of within vs. between  
7 networks and the mean Euclidean pairwise distances between ( $\alpha$ ,  $\tau$ ) points in Euclidean space, computed for  
8 each participant, as a dependent variable, while regressing out the effects of age and gender. Additionally, for  
9 VisN and DAN nodes, where a canonical gamma response appears a suitable model, we computed a  
10 Kolmogorov-Smirnov (KS) statistic indicating the degree to which the BOLD time-courses of each participant  
11 deviate from the fitted shape-flexible and canonical gamma models. We examined if the amount of deviation  
12 was different between the models, in rmANOVAs for each node with a factor of optimal vs. canonical gamma  
13 function, while regressing out the effects of age and gender.

14 **State-specific late HDR.** To quantify the late HDR change associated with each HMM state, we computed the  
15 integral of the FIR-estimated BOLD slope within a time-window of 16-32 s after the electrophysiological  
16 trigger frames. Given prior evidence of a positive correlation between low-frequency electrophysiological  
17 activity and BOLD signal intensity in the DMN<sup>57,58,162</sup>, a BOLD signal increase was expected to be evoked by  
18 DMN and aDMN HMM states. We tested the statistical significance of the late positive HDR evoked by these  
19 states in an omnibus rmANOVA that examined the main effect of change from baseline during the late epoch  
20 and its interaction with the ROI factor (defined based on DMN and aDMN state-specific significant clusters in  
21 whole-cortex analysis), while regressing out the effects of age and gender. Huynh and Feldt correction was  
22 applied to all repeated measures with  $> 1$  degree of freedom<sup>160</sup>. In follow-up analyses, we examined simple  
23 effects of the late BOLD change from baseline in each ROI. In a similar control rmANOVA, we checked for  
24 any significant BOLD effects in the late time-window for DAN, VisN, and SMN states (ROI factor defined  
25 based on the clusters specific to these states).

26 To understand the functional significance of the late positive HDR in the DMN, we considered whether  
27 this upregulation in HDR was related to sustenance of the overall temporal pattern of DMN coordinated  
28 electrophysiological activity. In cross-sectional analysis, we again used the integral of the FIR-estimated  
29 BOLD slope to quantify the DMN HDR positive lobe (a metric of positive BOLD responsiveness) and  
30 computed a partial cross-sectional correlation, regressing out the effects of age and gender, between the mean  
31 of these metrics across DMN state-specific ROIs and the power law fit of the electrophysiological PDFs of  
32 DMN state lifetimes and intervals (for easier interpretation, we used “fit” computed as the KS deviation  
33 statistic multiplied by -1). In follow-up analyses, we computed additional partial correlations to determine  
34 which DMN ROIs contributed to the association between positive BOLD responsiveness and the  
35 electrophysiological power law fit and visualized the associations using scatterplots. In similar control  
36 analyses, we checked for associations between BOLD responsiveness metrics in other networks (i.e., the  
37 integral of the FIR-estimated BOLD slope in the early HDR lobe for all states and in the late lobe for the  
38 aDMN) and the corresponding power law fit of state-specific electrophysiological lifetimes/intervals.

39 To describe the cortical topography of late positive HDR effects, we used a whole-cortex analysis  
40 approach. We modeled the HDR time-locked to the electrophysiological trigger frames but fitted a gamma  
41 response function with a delay to capture the late epoch. Participant-specific statistical models were computed  
42 as described above. For the DMN state, group analysis modeled an interaction between the BOLD parameter  
43 and the power law fit of electrophysiological lifetimes as well as the expected BOLD parameter if the  
44 deviation from the power law were equal to 0 (i.e., the intercept). For the aDMN state, group statistics were  
45 computed for the main effect of the BOLD metric change from baseline. Significant clusters ( $p < 0.05$ ,  
46 corrected) were displayed on the inflated average template of the cortical surface.

47 **Associations with WMSA.** Structural MRI images were processed using the standard recon-all stream in  
48 FreeSurfer, and reconstructed brain volumes underwent automatic segmentation of grey and white matter.  
49 Volumetric measurement of WMSA, a surrogate marker of cerebrovascular damage<sup>64-66</sup>, was performed using  
50 a FreeSurfer-based validated tool<sup>67</sup>, and WMSA volumes were adjusted to control for total intracranial volume

1 differences and natural log transformed due to their non-normal distribution. In cross-sectional analysis, we  
2 examined a possible link with cerebrovascular health by computing a partial correlation, regressing out the  
3 effects of age and gender, between WMSA volumes and positive BOLD responsiveness averaged across  
4 DMN state-specific ROIs. In follow-up analyses, we computed additional partial correlations to identify the  
5 DMN ROIs contributing to the association between WMSA volumes and BOLD responsiveness.

6 **Associations with memory.** Readiness to engage in episodic memory encoding would be expected to  
7 influence capacity for immediate recall, which is associated with neural activity patterns in the DMN  
8 dissociable from those linked to delayed recall<sup>68</sup>. Immediate verbal recall was assessed using the WLM-I<sup>71</sup>,  
9 which orally presents two short stories (one story twice) and asks participants to retell each story from  
10 memory immediately after hearing it. Immediate non-verbal recall was evaluated with the BVMT<sup>72</sup>, which  
11 consists of three trials, each presenting six geometric designs on a sheet of paper, and asks participants to  
12 reproduce the designs from memory immediately after each trial. Previously, scaling of neural lifetimes has  
13 been linked to behavioral parameters<sup>46</sup>. We examined whether the power law fit of the DMN PDF of  
14 electrophysiological lifetimes, suggestive of a mental state of optimal readiness to engage in information  
15 processing (i.e., criticality)<sup>69,70</sup>, predicts immediate episodic recall. In cross-sectional analysis, we computed  
16 partial correlations, regressing out the effects of age and gender, between the power law fit metric and the sum  
17 of normalized scores on the WLM-I and BVMT. In follow-up analyses, we used additional partial correlations  
18 to examine contributions from verbal and non-verbal recall to this association.

19 **Code availability.** Code is available from the authors upon request.

20 **Data availability.** Data is available from the authors in accordance with procedures approved by the Mass  
21 General Brigham Institutional Review Board.

#### 22 **Author Contributions**

23 T.S. and D.H.S. designed the study. T.S., M.W.W. and J.W.H. developed the method. T.S. and J.W.H. performed  
24 analysis. T.S., J.W.H., C.M.H., and K.A.S. conducted experiments. T.S. and J.W.H. wrote and revised the manuscript.  
25 M.W.W. and D.H.S. reviewed and edited the manuscript.

26 **Acknowledgements.** This research was carried out in whole or in part at the Athinoula A. Martinos Center for  
27 Biomedical Imaging at the Massachusetts General Hospital.

## 28 **Supplemental Information**

### 29 **Supplemental Discussion**

30 **Biphasic DMN HDR: Spectral properties of neural activity.** The DMN has long been known to show  
31 unique BOLD features, including well-known reductions evoked by sensory loads<sup>163</sup>. One specific distinction  
32 of the DMN that could account for the biphasic negative-to-positive HDR may be in how the BOLD signal is  
33 influenced by spectral properties of neural activity. Distinct neuron-type-specific mechanisms that give rise to  
34 synchronized activity in the gamma band (~30-90 Hz) have been demonstrated to contribute to BOLD changes  
35 independently from those in lower-frequency bands<sup>99,164</sup>. Even though the gamma-BOLD relationship may be  
36 similar across the DMN and other networks, the BOLD response to the activity in the lower frequencies in the  
37 DMN may be distinctive.

38 The gamma activity patterns, coupled to neuronal spiking<sup>165-169</sup> and dependent on fast spiking  
39 interneurons<sup>164</sup>, are thought to represent information content of cognitive processes<sup>170,171</sup>. Increases in such  
40 fast neural activity are associated with BOLD rises, which are consistent across various neural  
41 networks<sup>110,162,172-179</sup>. In the current study, gamma was not quantified due to relatively low signal-to-noise  
42 ratio in this frequency band in our EEG recordings. However, an observation that amplitudes of lower-  
43 frequency electrophysiological activity (4-30 Hz), previously implicated in controlling neuronal spiking<sup>180</sup> and  
44 the gamma through inhibition<sup>117-120</sup>, were increased during the DMN state, as well as the VisN/SMN states,  
45 suggested that the gamma activity might have undergone transient suppressions. Reductions in the fast neural  
46 activity might contribute to the negative lobe of the BOLD response evoked by these states. Transient  
47 modulation of fast activity during resting state may serve to refresh the information content of network

1 patterns<sup>169,180,181</sup>, promoting memory replays of previously learned information<sup>181</sup> as well as exhaustive  
2 “exploration” of neural activity patterns to maximize responsiveness to environment<sup>70</sup>.

3 The neuronal mechanisms underlying the lower-frequency activity (~4-30 Hz) may be different between  
4 the DMN and VisN/SMN states and may be associated with differing energy demand. In the visual and  
5 sensorimotor cortices, involvement of a specific type of inhibitory interneurons that control vasoconstriction<sup>25</sup>  
6 may underlie the temporal correlation between increased low-frequency electrophysiological amplitudes and  
7 decreased BOLD intensity<sup>57,98–101,162</sup>. In contrast, in the DMN, a positive correlation has been observed in  
8 monkeys between electrophysiological activity at lower frequencies and polarographic oxygen measurements,  
9 which are analogous to the BOLD signal<sup>162</sup>. Similarly, in the human brain, lower-frequency  
10 electrophysiological activity in the DMN has been linked to the positive BOLD response<sup>57,58</sup>. Because the  
11 activity amplitudes are especially high in the DMN electrophysiological state<sup>15</sup>, high energy demands of  
12 mounting a synchronized inhibitory drive in this network may account for absence of a vasoconstricting  
13 response. In the present study, the positive BOLD response to the DMN state was observed in the later epoch,  
14 likely occurring after the eliciting neural activity was over and replenishing cellular resources needed for  
15 future activity events<sup>54</sup>. This may explain why responsiveness of the positive BOLD predicted the overall  
16 temporal pattern of the DMN states recurrence.

17 Notably, the timing of the late BOLD response to low-frequency electrophysiological changes in our study  
18 was consistent with prior clues in the literature. Previously, BOLD responses to task-evoked changes in low-  
19 frequency electrophysiological activity in the DMN were prolonged or observed with delays (~10-s long)<sup>184</sup>.  
20 In our study, the biphasic negative-to-positive BOLD in the DMN was likely due to summation between an  
21 earlier negative response to transient suppressions of high-frequency neural activity and a prolonged/late  
22 positive response to the increase in lower-frequency electrophysiological activity. In fact, a biphasic BOLD  
23 response in the DMN—but in the reverse positive-to-negative direction—was observed during a relational  
24 learning task<sup>185</sup>. It is possible that opposite modes of cross-frequency dynamics in the DMN during rest and a  
25 learning task<sup>186</sup> produce a biphasic response but with reverse directions. In a similar vein, longer HDR delays  
26 to task-related lower-frequency electrophysiological activity in the SMN<sup>187</sup>, but not VisN<sup>164</sup> are consistent  
27 with the trend evident in our study toward prolonged BOLD effect to the SMN state (Figure 5; even though  
28 not significant, the SMN time-course remained lower than baseline in the late epoch) but not VisN state.

29 **Biphasic DMN HDR: Metabolic-vascular coupling.** Alternatively, unique features of metabolic-vascular  
30 coupling might underlie the biphasic DMN HDR. Previously, when the DMN was compared to frontoparietal  
31 control and primary sensorimotor networks, its negative BOLD response to stimulation was characterized by  
32 an increased ratio between the cerebral metabolic rate of oxygen consumption and CBF<sup>125</sup>. This suggests a  
33 reduced responsiveness of CBF, perhaps due to distinct vascular biomechanics or regulation by the  
34 sympathetic nervous system<sup>188</sup>. If, in our study, such reduced coupling contributed to the initial negative  
35 BOLD evoked by the DMN electrophysiological state, then a delayed positive BOLD response might be  
36 expected when activity-induced pressure is relieved and coupling is normalized<sup>127</sup>. Another relevant piece of  
37 prior evidence is that aerobic glycolysis during rest is increased in the DMN relative to other brain regions<sup>189</sup>.  
38 It is possible that DMN neural activity triggers astrocytes to switch to aerobic glycolysis (i.e., energy  
39 production without oxygen), which would permit neurons to utilize all available tissue oxygen<sup>26</sup>. Therefore,  
40 only after an initial period of optimized oxygen consumption, marked by increasing tissue deoxygenation and  
41 a negative BOLD response, would an eventually needed blood influx generate a positive BOLD effect.  
42 Interestingly, vascular blood can also be “stolen” across adjacent cortical regions<sup>190</sup>. In the DMN, functional  
43 subspecialization is detected between adjacent subdivisions within each node<sup>77</sup>, which might explain why we  
44 observed slight loci differences for negative and positive DMN BOLD changes. It may be that redistribution  
45 of blood is optimized to support functional requirements of anatomical subdivisions.

46 **Neurovascular dynamics of the aDMN.** DMN and aDMN states showed similar patterns of biphasic HDR,  
47 which was not surprising given their spatial overlap in coordinated activity. Nonetheless, in contrast with the  
48 neurovascular dynamics of the DMN state, there was no significant association between positive BOLD  
49 responsiveness and temporal patterns of electrophysiological activity (quantified by a power law fit) in the  
50 aDMN state. One possible explanation for this distinction could be that the aDMN state corresponds to self-  
51 referential thought. Establishing and buffering internal trains of thought from disruptions by the external world

1 may involve intricate cognitive-control neural dynamics, including inhibitory influences both among the  
2 inferior frontal gyrus and DMN medial nodes<sup>41</sup> as well as from the frontoparietal control network<sup>191,192</sup>.  
3 Consistent with such complex dynamics, the aDMN state evoked initial BOLD reductions involving the  
4 medial and inferolateral prefrontal cortices, followed by a positive BOLD response encompassing the  
5 dorsolateral prefrontal and medial parietal cortices. Our HMM approach used a simple observation model  
6 based on lower-frequency electrophysiological activity amplitudes. Thus, even if able to distinguish a DMN  
7 state from other states, this analysis alone would not comprehensively describe the underlying  
8 neurophysiological processes. On the contrary, the evoked HDR (estimated using a combination of the HMM  
9 and information from the EEG and BOLD data) would be expected to more fully represent underlying neural  
10 changes, including inhibitory neuronal activity, which can result in a positive BOLD response<sup>193,194</sup>.  
11 Engagement of cognitive control by the aDMN state would explain why temporal activation patterns may be  
12 less regulated by the pace of replenished metabolic resources (i.e., BOLD responsiveness) and why lifetimes  
13 of the aDMN state show increased deviations from scaling according to a power law.

## 1 Supplemental Figures

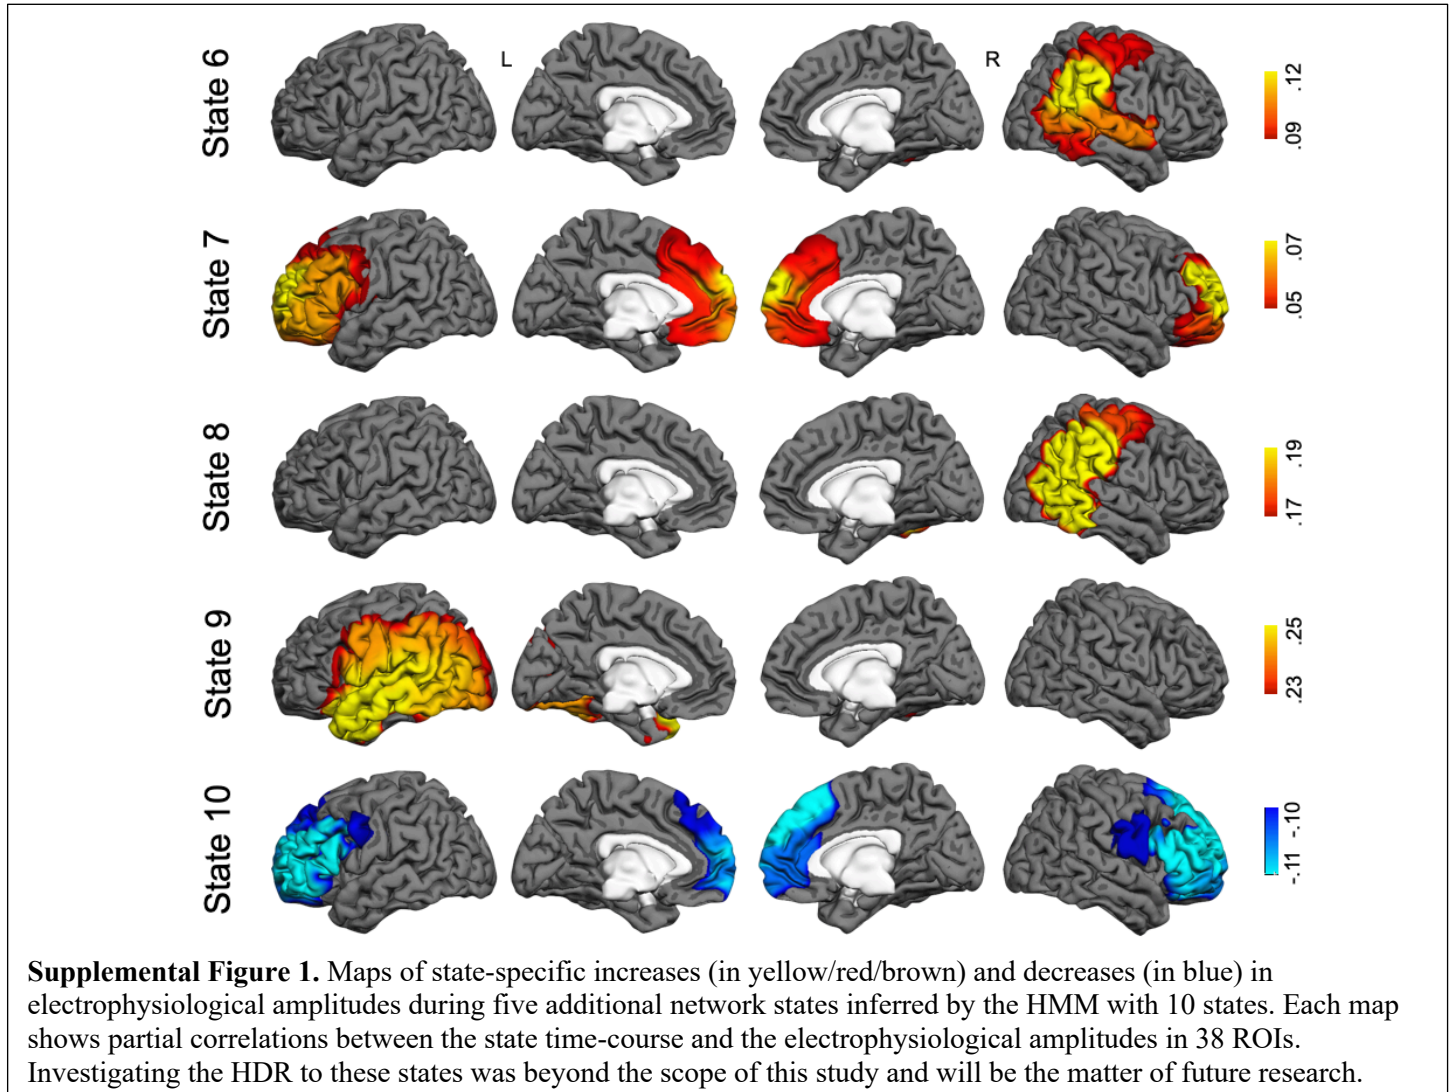

2

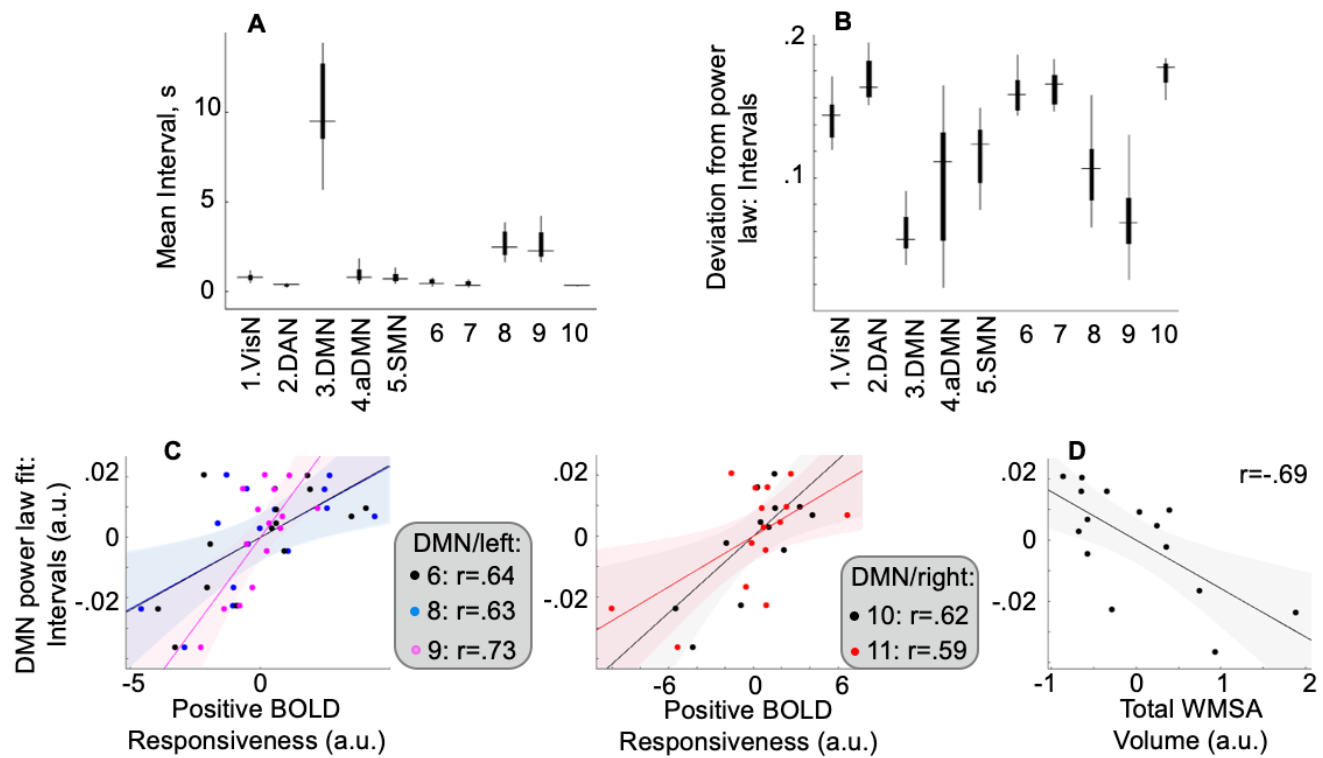

### Supplemental Figure 2.

Upper panel: The temporal structure of intervals between the inferred HMM states. For each electrophysiologically defined network and participant, we computed the mean of intervals between coordinated activity states (**A**) and the deviation between empirical interval data and the power law function fitted using maximum likelihood estimation (**B**). Boxplots for the five salient states (1–5; shown in Figure 2) and five other modeled states (6–10; shown in Supplemental Figure 1) summarize the group results (medians and 25th/75th percentiles; whiskers extend to the most extreme points not including outliers). A comparison of DMN/aDMN states to the DAN state based on the PDF of intervals between network activity states revealed differences in the extent of deviation from the power law (effect of state in omnibus ANOVA,  $F=49.73$ ,  $p<0.05$ ; follow-up: DMN<DAN,  $F=735.74$ , Cohen's  $d=5.15$ , DMN<aDMN,  $F=8.43$ ,  $d=.68$ , aDMN<DAN,  $F=28.12$ ,  $d=1.45$ ,  $ps<0.05$ ). Thus, the interval parameter, similar to the lifetime parameter, suggested that the DMN state shows temporal activity structure closest to critical behavior.

Lower panel: Cross-sectional association between cerebrovascular factors and the temporal structure of intervals between DMN electrophysiological activity states, after controlling for age and gender. DMN state-specific positive BOLD responsiveness averaged across all seven DMN nodes was associated with the fit between the PDF of intervals between DMN electrophysiological activity states and the power law (negative of the deviation statistic in the upper panel;  $r=0.61$ ,  $p<0.05$ ). Follow-up analyses revealed that this result was driven by five nodes (**C**); for all  $r$ -values,  $p<0.05$ ; node numbers correspond to significant clusters in Figure 4. We found no association in control analyses between analogous BOLD responsiveness metrics for other HDR effects and corresponding interval-based power law statistics ( $abs(r)<0.38$ ,  $p>0.16$ ). Unlike the statistic computed based on DMN lifetimes, the power law fit estimated based on DMN intervals was not correlated with verbal or spatial episodic memory ( $rs<0.15$   $ps>0.61$ ) but was correlated with global WMSA volumes (**D**), which are an indicator of general cerebrovascular health. Differences in network connectivity patterns and cellular resource availability can both influence whether a network establishes critical behavior<sup>106–108,195,196</sup>. It is possible that these factors differentially modulate state lifetimes and intervals between coordinated activity states. Shaded areas, 95% confidence bounds.

## 1 References

- 2
- 3 1. Frere, S. & Slutsky, I. Alzheimer's Disease: From Firing Instability to Homeostasis Network Collapse. *Neuron* **97**, 32–58 (2018).
- 4
- 5 2. Brier, M. R. *et al.* Loss of intranetwork and internetwork resting state functional connections with
- 6 Alzheimer's disease progression. *J Neurosci* **32**, 8890–8899 (2012).
- 7 3. Sheline, Y. I. *et al.* APOE4 allele disrupts resting state fMRI connectivity in the absence of amyloid
- 8 plaques or decreased CSF Aβ42. *J Neurosci* **30**, 17035–17040 (2010).
- 9 4. Pasquini, L. *et al.* Individual Correspondence of Amyloid-β and Intrinsic Connectivity in the Posterior
- 10 Default Mode Network Across Stages of Alzheimer's Disease. *J. Alzheimer's Dis.* **58**, 763–773 (2017).
- 11 5. Buxton, R. B. The physics of functional magnetic resonance imaging (fMRI). *Rep Prog Phys* **76**, 96601
- 12 (2013).
- 13 6. Gupta, A. *et al.* Neuroimaging of cerebrovascular disease in the aging brain. *Aging Dis.* **3**, 414–25
- 14 (2012).
- 15 7. Love, S. & Miners, J. S. Cerebrovascular disease in ageing and Alzheimer's disease. *Acta*
- 16 *Neuropathologica* **131**, 645–658 (2016).
- 17 8. Ward, Phillip G D, Edwina R Orchard, Stuart Oldham, Aurina Arnatkeviciute, Francesco Sforazzini,
- 18 Alex Fornito, Gary Egan, and Sharna D Jamadar. 2019. "Individual Differences in Haemoglobin
- 19 Concentration Influence BOLD FMRI Functional Connectivity and Its Correlation with Cognition."
- 20 *BioRxiv*, 835660. <https://doi.org/10.1101/835660>.
- 21 9. Crossley, N. A. *et al.* Cognitive relevance of the community structure of the human brain functional
- 22 coactivation network. *Proc. Natl. Acad. Sci. U. S. A.* **110**, 11583–11588 (2013).
- 23 10. Toro, R., Fox, P. T. & Paus, T. Functional coactivation map of the human brain. *Cereb. Cortex* **18**,
- 24 2553–2559 (2008).
- 25 11. Smith, Stephen M., Diego Vidaurre, Christian F. Beckmann, Matthew F. Glasser, Mark Jenkinson,
- 26 Karla L. Miller, Thomas E. Nichols, et al. 2013. "Functional Connectomics from Resting-State FMRI."
- 27 *Trends in Cognitive Sciences*. Elsevier. <https://doi.org/10.1016/j.tics.2013.09.016>.
- 28 12. Keilholz, S. D. The neural basis of time-varying resting-state functional connectivity. *Brain*
- 29 *connectivity* **4**, 769–779 (2014).
- 30 13. Proudfoot, M., Woolrich, M. W., Nobre, A. C. & Turner, M. R. Magnetoencephalography. *Pr. Neurol*
- 31 **14**, 336–343 (2014).
- 32 14. Baker, A. P. *et al.* Fast transient networks in spontaneous human brain activity. *Elife* **3**, e01867 (2014).
- 33 15. Vidaurre, D. *et al.* Spontaneous cortical activity transiently organises into frequency specific phase-
- 34 coupling networks. *Nat. Commun.* **9**, 2987 (2018).
- 35 16. Sitnikova, T. A., Hughes, J. W., Ahlfors, S. P., Woolrich, M. W. & Salat, D. H. Short timescale
- 36 abnormalities in the states of spontaneous synchrony in the functional neural networks in Alzheimer's
- 37 disease. *NeuroImage Clin.* **20**, 128–152 (2018).
- 38 17. Hunyadi, B., Woolrich, M. W., Quinn, A. J., Vidaurre, D. & De Vos, M. A dynamic system of brain
- 39 networks revealed by fast transient EEG fluctuations and their fMRI correlates. *Neuroimage* **185**, 72–82
- 40 (2019).
- 41 18. Britz, J., Van De Ville, D. & Michel, C. M. BOLD correlates of EEG topography reveal rapid resting-
- 42 state network dynamics. *Neuroimage* **52**, 1162–1170 (2010).
- 43 19. Yuan, H., Zotev, V., Phillips, R., Drevets, W. C. & Bodurka, J. Spatiotemporal dynamics of the brain at
- 44 rest--exploring EEG microstates as electrophysiological signatures of BOLD resting state networks.
- 45 *Neuroimage* **60**, 2062–2072 (2012).
- 46 20. Chen, G., Saad, Z. S., Adleman, N. E., Leibenluft, E. & Cox, R. W. Detecting the subtle shape

1 differences in hemodynamic responses at the group level. *Front. Neurosci.* **9**, (2015).

- 2 21. Barch, D. M. *et al.* Hemodynamic responses in visual, motor, and somatosensory cortices in  
3 schizophrenia. *Neuroimage* **20**, 1884–1893 (2003).
- 4 22. Boynton, G. M., Engel, S. A., Glover, G. H. & Heeger, D. J. Linear systems analysis of functional  
5 magnetic resonance imaging in human V1. *J. Neurosci.* **16**, 4207–4221 (1996).
- 6 23. Dale, A. M. & Buckner, R. L. Selective averaging of rapidly presented individual trials using fMRI.  
7 *Hum. Brain Mapp.* **5**, 329–340 (1997).
- 8 24. Raichle, M. E. & Gusnard, D. A. Appraising the brain’s energy budget. *Proceedings of the National*  
9 *Academy of Sciences of the United States of America* **99**, 10237–10239 (2002).
- 10 25. Uhlirova, H. *et al.* Cell type specificity of neurovascular coupling in cerebral cortex. *Elife* **5**, (2016).
- 11 26. Fernández-Moncada, I. *et al.* Neuronal control of astrocytic respiration through a variant of the Crabtree  
12 effect. *Proc. Natl. Acad. Sci. U. S. A.* **115**, 1623–1628 (2018).
- 13 27. Jones, D. T. *et al.* Age-related changes in the default mode network are more advanced in Alzheimer  
14 disease. *Neurology* **77**, 1524–1531 (2011).
- 15 28. Brier, M. R. *et al.* Loss of intranetwork and internetwork resting state functional connections with  
16 Alzheimer’s disease progression. *J. Neurosci.* **32**, 8890–8899 (2012).
- 17 29. Brier, M. R., Thomas, J. B. & Ances, B. M. Network Dysfunction in Alzheimer’s Disease: Refining the  
18 Disconnection Hypothesis. *Brain Connect.* **4**, 299–311 (2014).
- 19 30. Colclough, G. L., Brookes, M. J., Smith, S. M. & Woolrich, M. W. A symmetric multivariate leakage  
20 correction for MEG connectomes. *Neuroimage* **117**, 439–448 (2015).
- 21 31. Fox, M. D., Corbetta, M., Snyder, A. Z., Vincent, J. L. & Raichle, M. E. Spontaneous neuronal activity  
22 distinguishes human dorsal and ventral attention systems. *Proc Natl Acad Sci U S A* **103**, 10046–10051  
23 (2006).
- 24 32. Greicius, M. D., Krasnow, B., Reiss, A. L. & Menon, V. Functional connectivity in the resting brain: a  
25 network analysis of the default mode hypothesis. *Proc Natl Acad Sci U S A* **100**, 253–258 (2003).
- 26 33. Lowe, M. J., Mock, B. J. & Sorenson, J. A. Functional connectivity in single and multislice echoplanar  
27 imaging using resting-state fluctuations. *Neuroimage* **7**, 119–132 (1998).
- 28 34. Biswal, B., Yetkin, F. Z., Haughton, V. M. & Hyde, J. S. Functional connectivity in the motor cortex of  
29 resting human brain using echo-planar MRI. *Magn Reson Med* **34**, 537–541 (1995).
- 30 35. Di, X. & Biswal, B. B. Modulatory interactions between the default mode network and task positive  
31 networks in resting-state. *PeerJ* **2**, e367 (2014).
- 32 36. Yeo, B. T. *et al.* The organization of the human cerebral cortex estimated by intrinsic functional  
33 connectivity. *J Neurophysiol* **106**, 1125–1165 (2011).
- 34 37. Barch, D. M. & Berenbaum, H. Language generation in schizophrenia and mania: the relationships  
35 among verbosity, syntactic complexity, and pausing. *J Psycholinguist Res* **26**, 401–412 (1997).
- 36 38. Moussa, M. N., Steen, M. R., Laurienti, P. J. & Hayasaka, S. Consistency of Network Modules in  
37 Resting-State fMRI Connectome Data. *PLoS One* **7**, (2012).
- 38 39. Corbetta, M. & Shulman, G. L. Control of goal-directed and stimulus-driven attention in the brain. *Nat*  
39 *Rev Neurosci* **3**, 201–215 (2002).
- 40 40. Fox, M. D. *et al.* The human brain is intrinsically organized into dynamic, anticorrelated functional  
41 networks. *Proc Natl Acad Sci U S A* **102**, 9673–9678 (2005).
- 42 41. Soch, J. *et al.* Inhibition of Information Flow to the Default Mode Network During Self-Reference  
43 Versus Reference to Others. *Cereb. Cortex* (2016). doi:10.1093/cercor/bhw206
- 44 42. Ashourvan, A., Gu, S., Mattar, M. G., Vettel, J. M. & Bassett, D. S. The energy landscape underpinning  
45 module dynamics in the human brain connectome. *Neuroimage* **157**, 364–380 (2017).



- 1 43. Roberts, J. A. *et al.* Metastable brain waves. *Nat. Commun.* **10**, 1–17 (2019).
- 2 44. Shriki, O. *et al.* Neuronal avalanches in the resting MEG of the human brain. *J. Neurosci.* **33**, 7079–  
3 7090 (2013).
- 4 45. Allegrini, P. Fractal complexity in spontaneous EEG metastable-state transitions: new vistas on  
5 integrated neural dynamics. *Front. Physiol.* **1**, (2010).
- 6 46. Palva, J. Matias, Alexander Zhigalov, Jonni Hirvonen, Onerva Korhonen, Klaus Linkenkaer-Hansen,  
7 and Satu Palva. 2013. “Neuronal Long-Range Temporal Correlations and Avalanche Dynamics Are  
8 Correlated with Behavioral Scaling Laws.” *Proceedings of the National Academy of Sciences of the*  
9 *United States of America* 110 (9): 3585–90. <https://doi.org/10.1073/pnas.1216855110>.
- 10 47. Roberts, J. A., Boonstra, T. W. & Breakspear, M. The heavy tail of the human brain. *Curr. Opin.*  
11 *Neurobiol.* **31**, 164–172 (2015).
- 12 48. Bellay, T., Klaus, A., Seshadri, S. & Plenz, D. Irregular spiking of pyramidal neurons organizes as  
13 scale-invariant neuronal avalanches in the awake state. *Elife* **4**, e07224 (2015).
- 14 49. Zhigalov, A., Arnulfo, G., Nobili, L., Palva, S. & Palva, J. M. Modular co-organization of functional  
15 connectivity and scale-free dynamics in the human brain. *Netw. Neurosci.* **1**, 143–165. (2017).
- 16 50. Capolupo, A., Freeman, W. J. & Vitiello, G. Dissipation of ‘dark energy’ by cortex in knowledge  
17 retrieval. *Physics of Life Reviews* **10**, 85–94 (2013).
- 18 51. Cocchi, L., Gollo, L. L., Zalesky, A. & Breakspear, M. Criticality in the brain: A synthesis of  
19 neurobiology, models and cognition. *Progress in Neurobiology* **158**, 132–152 (2017).
- 20 52. Marshall, N. *et al.* Analysis of Power Laws, Shape Collapses, and Neural Complexity: New Techniques  
21 and MATLAB Support via the NCC Toolbox. *Front. Physiol.* **7**, 250 (2016).
- 22 53. Hahn, G. *et al.* Spontaneous cortical activity is transiently poised close to criticality. *PLOS Comput.*  
23 *Biol.* **13**, e1005543 (2017).
- 24 54. Hillman, E. M. C. Coupling Mechanism and Significance of the BOLD Signal: A Status Report. *Annu.*  
25 *Rev. Neurosci.* **37**, 161–181 (2014).
- 26 55. Ungerleider, L. G. & Haxby, J. V. ‘What’ and ‘where’ in the human brain. *Curr. Opin. Neurobiol.* **4**,  
27 157–165 (1994).
- 28 56. Smith, S. M. *et al.* Functional connectomics from resting-state fMRI. *Trends in Cognitive Sciences* **17**,  
29 666–682 (2013).
- 30 57. Mantini, D., Perrucci, M. G., Del Gratta, C., Romani, G. L. & Corbetta, M. Electrophysiological  
31 signatures of resting state networks in the human brain. *Proc Natl Acad Sci U S A* **104**, 13170–13175  
32 (2007).
- 33 58. Marino, M., Arcara, G., Porcaro, C. & Mantini, D. Hemodynamic Correlates of Electrophysiological  
34 Activity in the Default Mode Network. *Front. Neurosci.* **13**, (2019).
- 35 59. Goodale, S. & Chang, C. Vigilance-dependent EEG correlates of the fMRI Default Mode Network. in  
36 *OHBM* (2019).
- 37 60. Fox, M. D. *et al.* The human brain is intrinsically organized into dynamic, anticorrelated functional  
38 networks. *Proc. Natl. Acad. Sci. U. S. A.* **102**, 9673–9678 (2005).
- 39 61. Zhu, S., Fang, Z., Hu, S., Wang, Z. & Rao, H. Resting State Brain Function Analysis Using Concurrent  
40 BOLD in ASL Perfusion fMRI. *PLoS One* **8**, (2013).
- 41 62. Pfefferbaum, A. *et al.* Cerebral Blood Flow in Posterior Cortical Nodes of the Default Mode Network  
42 Decreases with Task Engagement but Remains Higher than in Most Brain Regions. *Cereb. Cortex* **21**,  
43 233–244 (2011).
- 44 63. Buckner, R. L. *et al.* Molecular, structural, and functional characterization of Alzheimer’s disease:  
45 Evidence for a relationship between default activity, amyloid, and memory. *J. Neurosci.* **25**, 7709–7717  
46 (2005).

- 1 64. Lindemer, E. R., Greve, D. N., Fischl, B., Salat, D. H. & Gomez-Isla, T. White matter abnormalities  
2 and cognition in patients with conflicting diagnoses and CSF profiles. *Neurology* **90**, e1461–e1469  
3 (2018).
- 4 65. Wardlaw, J. M. *et al.* Neuroimaging standards for research into small vessel disease and its contribution  
5 to ageing and neurodegeneration. *The Lancet Neurology* **12**, 822–838 (2013).
- 6 66. Benedictus, M. R. *et al.* Brain volume and white matter hyperintensities as determinants of cerebral  
7 blood flow in Alzheimer’s disease. *Neurobiol. Aging* **35**, 2665–2670 (2014).
- 8 67. Lindemer, E. R. *et al.* White matter signal abnormality quality differentiates mild cognitive impairment  
9 that converts to Alzheimer’s disease from nonconverters. *Neurobiol. Aging* **36**, 2447–57 (2015).
- 10 68. Huo, L., Li, R., Wang, P., Zheng, Z. & Li, J. The default mode network supports episodic memory in  
11 cognitively unimpaired elderly individuals: Different contributions to immediate recall and delayed  
12 recall. *Front. Aging Neurosci.* **10**, 6 (2018).
- 13 69. Beggs, J. M. & Plenz, D. Neuronal avalanches in neocortical circuits. *J. Neurosci.* **23**, 11167–77  
14 (2003).
- 15 70. Cocchi, L., Gollo, L. L., Zalesky, A. & Breakspear, M. Criticality in the brain: A synthesis of  
16 neurobiology, models and cognition. (2017).
- 17 71. Abikoff, H. *et al.* Logical memory subtest of the Wechsler Memory Scale: age and education norms and  
18 alternate-form reliability of two scoring systems. *J. Clin. Exp. Neuropsychol. Off. J. Int. Neuropsychol.*  
19 *Soc.* **9**, 435–448 (1987).
- 20 72. Benedict, R. H. B., Groninger, L., Schretlen, D., Dobraski, M. & Shpritz, B. Revision of the brief  
21 visuospatial memory test: Studies of normal performance, reliability, and, validity. *Psychol. Assess.* **8**,  
22 145–153 (1996).
- 23 73. Sporns, O., Honey, C. J. & Kotter, R. Identification and classification of hubs in brain networks. *PLoS*  
24 *One* **2**, e1049 (2007).
- 25 74. Buckner, R. L. *et al.* Cortical hubs revealed by intrinsic functional connectivity: mapping, assessment  
26 of stability, and relation to Alzheimer’s disease. *J Neurosci* **29**, 1860–1873 (2009).
- 27 75. Deco, G., Kringelbach, M. L., Jirsa, V. K. & Ritter, P. The dynamics of resting fluctuations in the brain:  
28 metastability and its dynamical cortical core. *Sci Rep* **7**, 3095 (2017).
- 29 76. Deco, G., Van Hartevelt, T. J., Fernandes, H. M., Stevner, A. & Kringelbach, M. L. The most relevant  
30 human brain regions for functional connectivity: Evidence for a dynamical workspace of binding nodes  
31 from whole-brain computational modelling. *Neuroimage* **146**, 197–210 (2017).
- 32 77. Kernbach, J. M. *et al.* Subspecialization within default mode nodes characterized in 10,000 UK  
33 Biobank participants. *Proc. Natl. Acad. Sci. U. S. A.* **115**, 12295–12300 (2018).
- 34 78. Robinson, A. K. *et al.* Very high density EEG elucidates spatiotemporal aspects of early visual  
35 processing. *Sci. Rep.* **7**, 16248 (2017).
- 36 79. Gavaret, M., Maillard, L. & Jung, J. High-resolution EEG (HR-EEG) and magnetoencephalography  
37 (MEG). *Neurophysiol. Clin.* **45**, 105–111 (2015).
- 38 80. Brookes, M. J. *et al.* Source localisation in concurrent EEG/fMRI: applications at 7T. *Neuroimage* **45**,  
39 440–52 (2009).
- 40 81. Michel, C. M. & Brunet, D. EEG source imaging: A practical review of the analysis steps. *Front.*  
41 *Neurol.* **10**, (2019).
- 42 82. Ahlfors, S. P., Han, J., Belliveau, J. W. & Hämäläinen, M. S. Sensitivity of MEG and EEG to source  
43 orientation. *Brain Topogr.* **23**, 227–232 (2010).
- 44 83. Hari, R. & Puce, A. *MEG-EEG Primer*. (Oxford University Press, 2017).  
45 doi:10.1093/med/9780190497774.001.0001
- 46 84. Mason, M. F. *et al.* Wandering minds: the default network and stimulus-independent thought. *Science*

- 1 (80-). **315**, 393–395 (2007).
- 2 85. Raichle, M. E. & Snyder, A. Z. A default mode of brain function: A brief history of an evolving idea.  
3 *NeuroImage* **37**, 1083–1090 (2007).
- 4 86. Prestel, M., Steinfath, T. P., Tremmel, M., Stark, R. & Ott, U. fMRI BOLD correlates of EEG  
5 independent components: Spatial correspondence with the default mode network. *Front. Hum.*  
6 *Neurosci.* **12**, (2018).
- 7 87. Ryyänen, O. R. M., Hyttinen, J. A. K., Laarne, P. H. & Malmivuo, J. A. Effect of electrode density  
8 and measurement noise on the spatial resolution of cortical potential distribution. *IEEE Trans. Biomed.*  
9 *Eng.* **51**, 1547–1554 (2004).
- 10 88. Dale, A. M. & Sereno, M. I. Improved localization of cortical activity by combining EEG and MEG  
11 with MRI cortical surface reconstruction: A linear approach. *J. Cogn. Neurosci.* **5**, 162–176 (1993).
- 12 89. Jagust, W. Vulnerable Neural Systems and the Borderland of Brain Aging and Neurodegeneration.  
13 *Neuron* **77**, 219–234 (2013).
- 14 90. Engemann, D. A. *et al.* Combining magnetoencephalography with magnetic resonance imaging  
15 enhances learning of surrogate-biomarkers. *Elife* **9**, (2020).
- 16 91. Vidaurre, D. *et al.* Spectrally resolved fast transient brain states in electrophysiological data.  
17 *Neuroimage* **126**, 81–95 (2016).
- 18 92. D’Esposito, M., Zarahn, E., Aguirre, G. K. & Rypma, B. The effect of normal aging on the coupling of  
19 neural activity to the bold hemodynamic response. *Neuroimage* **10**, 6–14 (1999).
- 20 93. Grinband, J., Steffener, J., Razlighi, Q. R. & Stern, Y. BOLD neurovascular coupling does not change  
21 significantly with normal aging. *Hum. Brain Mapp.* **38**, 3538–3551 (2017).
- 22 94. Fabiani, M. *et al.* Neurovascular coupling in normal aging: A combined optical, ERP and fMRI study.  
23 *Neuroimage* **85**, 592–607 (2014).
- 24 95. Uncapher, M. R., Hutchinson, J. B. & Wagner, A. D. Dissociable effects of top-down and bottom-up  
25 attention during episodic encoding. *J. Neurosci.* **31**, 12613–28 (2011).
- 26 96. Schultz, J. & Lennert, T. BOLD signal in intraparietal sulcus covaries with magnitude of implicitly  
27 driven attention shifts. *Neuroimage* **45**, 1314–1328 (2009).
- 28 97. Pessoa, L., Kastner, S. & Ungerleider, L. G. Neuroimaging studies of attention: From modulation of  
29 sensory processing to top-down control. *Journal of Neuroscience* **23**, 3990–3998 (2003).
- 30 98. Yuan, H. *et al.* Negative covariation between task-related responses in alpha/beta-band activity and  
31 BOLD in human sensorimotor cortex: an EEG and fMRI study of motor imagery and movements.  
32 *Neuroimage* **49**, 2596–606 (2010).
- 33 99. Scheeringa, R. *et al.* Neuronal dynamics underlying high- and low-frequency EEG oscillations  
34 contribute independently to the human BOLD signal. *Neuron* **69**, 572–83 (2011).
- 35 100. Hermes, D. *et al.* Neurophysiologic correlates of fMRI in human motor cortex. *Hum. Brain Mapp.* **33**,  
36 1689–1699 (2012).
- 37 101. Liu, Y., Bengson, J., Huang, H., Mangun, G. R. & Ding, M. Top-down Modulation of Neural Activity  
38 in Anticipatory Visual Attention: Control Mechanisms Revealed by Simultaneous EEG-fMRI. *Cereb.*  
39 *Cortex* **bhu204** (2014). doi:10.1093/cercor/bhu204
- 40 102. Liégeois, R., Laumann, T. O., Snyder, A. Z., Zhou, J. & Yeo, B. T. T. Interpreting temporal fluctuations  
41 in resting-state functional connectivity MRI. *NeuroImage* **163**, 437–455 (2017).
- 42 103. Huo, L., Li, R., Wang, P., Zheng, Z. & Li, J. The default mode network supports episodic memory in  
43 cognitively unimpaired elderly individuals: Different contributions to immediate recall and delayed  
44 recall. *Front. Aging Neurosci.* **10**, (2018).
- 45 104. Simola, J., Zhigalov, A., Morales-Muñoz, I., Palva, J. M. & Palva, S. Critical dynamics of endogenous  
46 fluctuations predict cognitive flexibility in the Go/NoGo task. *Sci. Rep.* **7**, 1–10 (2017).

- 1 105. Van de Ville, D., Britz, J. & Michel, C. M. EEG microstate sequences in healthy humans at rest reveal  
2 scale-free dynamics. *Proc Natl Acad Sci U S A* **107**, 18179–18184 (2010).
- 3 106. Gosak, M. *et al.* Critical and supercritical spatiotemporal calcium dynamics in beta cells. *Front.*  
4 *Physiol.* **8**, (2017).
- 5 107. Stožer, A. *et al.* Heterogeneity and delayed activation as hallmarks of self-organization and criticality in  
6 excitable tissue. *Front. Physiol.* **10**, (2019).
- 7 108. Virkar, Y. S., Shew, W. L., Restrepo, J. G. & Ott, E. Feedback control stabilization of critical dynamics  
8 via resource transport on multilayer networks: How glia enable learning dynamics in the brain. *Phys.*  
9 *Rev. E* **94**, (2016).
- 10 109. Roberts, J. A., Iyer, K. K., Vanhatalo, S. & Breakspear, M. Critical role for resource constraints in  
11 neural models. *Front. Syst. Neurosci.* **8**, 154 (2014).
- 12 110. He, B. J., Snyder, A. Z., Zempel, J. M., Smyth, M. D. & Raichle, M. E. Electrophysiological correlates  
13 of the brain’s intrinsic large-scale functional architecture. *Proc. Natl. Acad. Sci. U. S. A.* **105**, 16039–44  
14 (2008).
- 15 111. Matsui, T., Murakami, T. & Ohki, K. Transient neuronal coactivations embedded in globally  
16 propagating waves underlie resting-state functional connectivity. *Proc. Natl. Acad. Sci. U. S. A.* **113**,  
17 6556–61 (2016).
- 18 112. Wardlaw, J. M., Valdés Hernández, M. C. & Muñoz-Maniega, S. What are white matter  
19 hyperintensities made of? Relevance to vascular cognitive impairment. *Journal of the American Heart*  
20 *Association* **4**, 001140 (2015).
- 21 113. Fallon, John, Phil Ward, Linden Parkes, Stuart Oldham, Aurina Arnatkevičiūtė, Alex Fornito, and Ben  
22 D. Fulcher. 2020. “Timescales of Spontaneous fMRI Fluctuations Relate to Structural Connectivity in  
23 the Brain.” *Network Neuroscience*, June, 1–29. [https://doi.org/10.1162/netn\\_a\\_00151](https://doi.org/10.1162/netn_a_00151).
- 24 114. Scheering, R., Koopmans, P. J., Van Mourik, T., Jensen, O. & Norris, D. G. The relationship between  
25 oscillatory EEG activity and the laminar-specific BOLD signal. *Proc. Natl. Acad. Sci. U. S. A.* **113**,  
26 6761–6766 (2016).
- 27 115. Zich, Catharina, Magdalena Nowak, Emily L Hinson, Andrew J Quinn, Diego Vidaurre, Mark W  
28 Woolrich, and Charlotte J Stagg. 2019. “Hidden Markov Modelling Reveals Relationship between  
29 MEG and TMS Measures of GABA.” In *OHBM*.
- 30 116. Lord, L. D., Expert, P., Huckins, J. F. & Turkheimer, F. E. Cerebral energy metabolism and the brain’s  
31 functional network architecture: An integrative review. *Journal of Cerebral Blood Flow and*  
32 *Metabolism* **33**, 1347–1354 (2013).
- 33 117. Wagner, J., Makeig, S., Hoopes, D. & Gola, M. Can Oscillatory Alpha-Gamma Phase-Amplitude  
34 Coupling be Used to Understand and Enhance TMS Effects? *Front. Hum. Neurosci.* **13**, (2019).
- 35 118. Canolty, R. T. & Knight, R. T. The functional role of cross-frequency coupling. *Trends in Cognitive*  
36 *Sciences* **14**, 506–515 (2010).
- 37 119. Spaak, E., Bonnefond, M., Maier, A., Leopold, D. A. & Jensen, O. Layer-specific entrainment of  
38 gamma-band neural activity by the alpha rhythm in monkey visual cortex. *Curr. Biol.* **22**, 2313–2318  
39 (2012).
- 40 120. Canolty, R. T. *et al.* High gamma power is phase-locked to theta oscillations in human neocortex.  
41 *Science (80-. )*. **313**, 1626–1628 (2006).
- 42 121. Belluscio, M. A., Mizuseki, K., Schmidt, R., Kempter, R. & Buzsáki, G. Cross-frequency phase-phase  
43 coupling between theta and gamma oscillations in the hippocampus. *J. Neurosci.* **32**, 423–435 (2012).
- 44 122. Goense, J., Bohraus, Y. & Logothetis, N. K. fMRI at high spatial resolution implications for BOLD-  
45 models. *Front. Comput. Neurosci.* **10**, (2016).
- 46 123. Sharoh, D. *et al.* Laminar specific fMRI reveals directed interactions in distributed networks during

- 1 language processing. *Proc. Natl. Acad. Sci. U. S. A.* **116**, 21185–21190 (2019).
- 2 124. Lawrence, S. J. D., Norris, D. G. & De Lange, F. P. Dissociable laminar profiles of concurrent bottom-  
3 up and top-down modulation in the human visual cortex. *Elife* **8**, (2019).
- 4 125. Mayhew, S. D., Mullinger, K. J., Bagshaw, A. P., Bowtell, R. & Francis, S. T. Investigating intrinsic  
5 connectivity networks using simultaneous BOLD and CBF measurements. *Neuroimage* **99**, 111–21  
6 (2014).
- 7 126. Stefanovic, B., Warnking, J. M. & Pike, G. B. Hemodynamic and metabolic responses to neuronal  
8 inhibition. *Neuroimage* **22**, 771–778 (2004).
- 9 127. Röther, J. *et al.* Negative dip in BOLD fMRI is caused by blood flow - Oxygen consumption  
10 uncoupling in humans. *Neuroimage* **15**, 98–102 (2002).
- 11 128. Dolev, I. *et al.* Spike bursts increase amyloid-beta 40/42 ratio by inducing a presenilin-1 conformational  
12 change. *Nat Neurosci* **16**, 587–595 (2013).
- 13 129. Hipskind, S. G. *et al.* Pulsed transcranial red/near-infrared light therapy using light-emitting diodes  
14 improves cerebral blood flow and cognitive function in veterans with chronic traumatic brain injury: A  
15 case series. *Photobiomodulation, Photomedicine, Laser Surg.* **37**, 77–84 (2019).
- 16 130. Brake, J. *et al.* Time-reversed ultrasonically encoded (TRUE) focusing for deep-tissue optogenetic  
17 modulation. in *Adaptive Optics and Wavefront Control for Biological Systems IV* (eds. Bifano, T. G.,  
18 Gigan, S. & Kubby, J.) **10502**, 35 (SPIE, 2018).
- 19 131. Shmuelof, L. & Zohary, E. Dissociation between ventral and dorsal fmri activation during object and  
20 action recognition. *Neuron* **47**, 457–470 (2005).
- 21 132. Lombardo, M. V. *et al.* Improving effect size estimation and statistical power with multi-echo fMRI  
22 and its impact on understanding the neural systems supporting mentalizing. *Neuroimage* **142**, 55–66  
23 (2016).
- 24 133. Moore, D. S. & McCabe, G. P. *Introduction to the practice of statistics*. (W. H. Freeman, 1998).
- 25 134. Hulley, S., Cummings, S., Browner, W., Grady, D. & Newman, T. *Designing clinical research : an  
26 epidemiologic approach*. (Lippincott Williams & Wilkins, 2013).
- 27 135. Harms, M. P. *et al.* Extending the Human Connectome Project across ages: Imaging protocols for the  
28 Lifespan Development and Aging projects. *Neuroimage* **183**, 972–984 (2018).
- 29 136. Jenkinson, M., Beckmann, C. F., Behrens, T. E., Woolrich, M. W. & Smith, S. M. Fsl. *Neuroimage* **62**,  
30 782–790
- 31 137. Friston, K., Ashburner, J., Kiebel, S., Nichols, T. & Penny, P. *Statistical Parametric Mapping: The  
32 Analysis of Functional Brain Images*. (2007).
- 33 138. Oostenveld, R., Fries, P., Maris, E. & Schoffelen, J. M. FieldTrip: Open source software for advanced  
34 analysis of MEG, EEG, and invasive electrophysiological data. *Comput Intell Neurosci* 156869 (2011).  
35 doi:10.1155/2011/156869
- 36 139. Dale, A. M., Fischl, B. & Sereno, M. I. Cortical surface-based analysis. I. Segmentation and surface  
37 reconstruction. *Neuroimage* **9**, 179–94. (1999).
- 38 140. Fischl, B., Sereno, M. I. & Dale, A. M. Cortical surface-based analysis. II: Inflation, flattening, and a  
39 surface-based coordinate system. *Neuroimage* **9**, 195–207. (1999).
- 40 141. Niazy, R. K., Beckmann, C. F., Iannetti, G. D., Brady, J. M. & Smith, S. M. Removal of FMRI  
41 environment artifacts from EEG data using optimal basis sets. *Neuroimage* **28**, 720–737 (2005).
- 42 142. Engemann, D. A. *et al.* Combining electrophysiology with MRI enhances learning of surrogate-  
43 biomarkers. *bioRxiv* **856336**, 1–35 (2019).
- 44 143. Hipp, J. F. & Siegel, M. BOLD fMRI Correlation Reflects Frequency-Specific Neuronal Correlation.  
45 *Curr Biol* **25**, 1368–1374 (2015).
- 46 144. Phillips, C. Source estimation in EEG. PhD thesis, University de Liege, Belgium.

- 1 <http://www.fil.ion.ucl.ac.uk/spm/doc/theses/chrisp/localis.pdf>; especially chapters 3, 4 and 5. (2000).
- 2 145. Van Veen, B. D., van Drongelen, W., Yuchtman, M. & Suzuki, A. Localization of brain electrical  
3 activity via linearly constrained minimum variance spatial filtering. *IEEE Trans Biomed Eng* **44**, 867–  
4 880 (1997).
- 5 146. Vrba, J. & Robinson, S. E. Signal processing in magnetoencephalography. *Methods* **25**, 249–271  
6 (2001).
- 7 147. Woolrich, M., Hunt, L., Groves, A. & Barnes, G. MEG beamforming using Bayesian PCA for adaptive  
8 data covariance matrix regularization. *Neuroimage* **57**, 1466–1479 (2011).
- 9 148. Sekihara, K., Hild 2nd, K. E. & Nagarajan, S. S. A novel adaptive beamformer for MEG source  
10 reconstruction effective when large background brain activities exist. *IEEE Trans Biomed Eng* **53**,  
11 1755–1764 (2006).
- 12 149. Sekihara, K., Nagarajan, S. S., Poeppel, D., Marantz, A. & Miyashita, Y. Reconstructing spatio-  
13 temporal activities of neural sources using an MEG vector beamformer technique. *IEEE Trans Biomed*  
14 *Eng* **48**, 760–771 (2001).
- 15 150. Van Essen, D. C. *et al.* The WU-Minn Human Connectome Project: an overview. *Neuroimage* **80**, 62–  
16 79 (2013).
- 17 151. Colclough, G. L. *et al.* How reliable are MEG resting-state connectivity metrics? *Neuroimage* **138**,  
18 284–293 (2016).
- 19 152. Everson, R. Orthogonal, but not orthonormal, procrustes problems, Imperial Col-lege Technical Report  
20 TR99-6. Available at <http://empslocal.ex.ac.uk/people/staff/reverson/uploads/Site/procrustes.pdf>  
21 (1999).
- 22 153. Löwdin, P. On the Non-Orthogonality Problem Connected with the Use of Atomic Wave Functions in  
23 the Theory of Molecules and Crystals. *J. Chem. Phys.* **18**, 365–375 (1950).
- 24 154. Palva, J. Matias, Sheng H. Wang, Satu Palva, Alexander Zhigalov, Simo Monto, Matthew J. Brookes,  
25 Jan Mathijs Schoffelen, and Karim Jerbi. 2018. “Ghost Interactions in MEG/EEG Source Space: A  
26 Note of Caution on Inter-Areal Coupling Measures.” *NeuroImage* 173 (June): 632–43.  
27 <https://doi.org/10.1016/j.neuroimage.2018.02.032>.
- 28 155. Kiebel, S. J., Tallon-Baudry, C. & Friston, K. J. Parametric analysis of oscillatory activity as measured  
29 with EEG/MEG. *Hum Brain Mapp* **26**, 170–177 (2005).
- 30 156. Rukat, T., Baker, A., Quinn, A. & Woolrich, M. Resting state brain networks from EEG: Hidden  
31 Markov states vs. classical microstates. *arXiv:1606.02344* (2016).
- 32 157. Rezek, I. & Roberts, S. Ensemble hidden markov models with extended observation densities for  
33 biosignal analysis. in *Probabilistic Modeling in Bioinformatics and Medical Informatics* (eds.  
34 Husmeier, D., Dybowski, R. & Roberts, S.) 419–450 (Springer London, 2005).
- 35 158. Brookes, M. J. *et al.* A general linear model for MEG beamformer imaging. *Neuroimage* **23**, 936–946  
36 (2004).
- 37 159. Friston, K. J. *et al.* A multivariate analysis of evoked responses in EEG and MEG data. *Neuroimage* **3**,  
38 167–174 (1996).
- 39 160. Huynh, H. & Feldt, L. S. Estimation of the Box Correction for Degrees of Freedom from Sample Data  
40 in Randomized Block and Split-Plot Designs. *J. Educ. Stat.* **1**, 69 (1976).
- 41 161. Durlak, J. A. How to select, calculate, and interpret effect sizes. *Journal of Pediatric Psychology* **34**,  
42 917–928 (2009).
- 43 162. Bentley, W. J., Li, J. M., Snyder, A. Z., Raichle, M. E. & Snyder, L. H. Oxygen Level and LFP in Task-  
44 Positive and Task-Negative Areas: Bridging BOLD fMRI and Electrophysiology. *Cereb. Cortex* **26**,  
45 346–357 (2016).
- 46 163. Shulman, G. L. *et al.* Common blood flow changes across visual tasks: II. Decreases in cerebral cortex.

- 1 *J. Cogn. Neurosci.* **9**, 648–663 (1997).
- 2 164. Cardin, J. A. *et al.* Driving fast-spiking cells induces gamma rhythm and controls sensory responses.  
3 *Nature* **459**, 663–667 (2009).
- 4 165. Shmuel, A. & Leopold, D. A. Neuronal correlates of spontaneous fluctuations in fMRI signals in  
5 monkey visual cortex: Implications for functional connectivity at rest. *Hum. Brain Mapp.* **29**, 751–761  
6 (2008).
- 7 166. Nir, Y. *et al.* Coupling between Neuronal Firing Rate, Gamma LFP, and BOLD fMRI Is Related to  
8 Interneuronal Correlations. *Curr. Biol.* **17**, 1275–1285 (2007).
- 9 167. Fries, P., Scheeringa, R. & Oostenveld, R. Finding Gamma. *Neuron* **58**, 303–305 (2008).
- 10 168. Cabral, J. *et al.* Structural connectivity in schizophrenia and its impact on the dynamics of spontaneous  
11 functional networks. *Chaos* **23**, 46111
- 12 169. Watson, B. O., Ding, M. & Buzsáki, G. Temporal coupling of field potentials and action potentials in  
13 the neocortex. *Eur. J. Neurosci.* **48**, 2482–2497 (2018).
- 14 170. Bastos, A. M., Loonis, R., Kornblith, S., Lundqvist, M. & Miller, E. K. Laminar recordings in frontal  
15 cortex suggest distinct layers for maintenance and control of working memory. *Proc. Natl. Acad. Sci.*  
16 *U. S. A.* **115**, 1117–1122 (2018).
- 17 171. Honkanen, R., Rouhinen, S., Wang, S., Palva, J. & Palva, S. Gamma Oscillations Underlie the  
18 Maintenance of Feature-Specific Information and the Contents of Visual Working Memory. *Cereb*  
19 *Cortex* **25**, 3788–3801 (2015).
- 20 172. Goense, J. B. M. & Logothetis, N. K. Neurophysiology of the BOLD fMRI Signal in Awake Monkeys.  
21 *Curr. Biol.* **18**, 631–640 (2008).
- 22 173. Logothetis, N. K., Pauls, J., Augath, M., Trinath, T. & Oeltermann, A. Neurophysiological investigation  
23 of the basis of the fMRI signal. *Nature* **412**, 150–157 (2001).
- 24 174. Koch, S. P., Werner, P., Steinbrink, J., Fries, P. & Obrig, H. Stimulus-induced and state-dependent  
25 sustained gamma activity is tightly coupled to the hemodynamic response in humans. *J. Neurosci.* **29**,  
26 13962–70 (2009).
- 27 175. Niessing, J. *et al.* Neuroscience: Hemodynamic signals correlate tightly with synchronized gamma  
28 oscillations. *Science (80-. )*. **309**, 948–951 (2005).
- 29 176. Magri, C., Schridde, U., Murayama, Y., Panzeri, S. & Logothetis, N. K. The amplitude and timing of  
30 the BOLD signal reflects the relationship between local field potential power at different frequencies. *J.*  
31 *Neurosci.* **32**, 1395–407 (2012).
- 32 177. Sumiyoshi, A. *et al.* Coupling between gamma oscillation and fMRI signal in the rat somatosensory  
33 cortex: Its dependence on systemic physiological parameters. (2012).  
34 doi:10.1016/j.neuroimage.2011.12.082
- 35 178. Scholvinck, M. L., Maier, A., Ye, F. Q., Duyn, J. H. & Leopold, D. A. Neural basis of global resting-  
36 state fMRI activity. *Proc. Natl. Acad. Sci.* **107**, 10238–10243 (2010).
- 37 179. Hacker, C. D., Snyder, A. Z., Pahwa, M., Corbetta, M. & Leuthardt, E. C. Frequency-specific  
38 electrophysiologic correlates of resting state fMRI networks. *Neuroimage* **149**, 446–457 (2017).
- 39 180. Haegens, S., Nacher, V., Luna, R., Romo, R. & Jensen, O.  $\alpha$ -Oscillations in the monkey sensorimotor  
40 network influence discrimination performance by rhythmical inhibition of neuronal spiking. *Proc. Natl.*  
41 *Acad. Sci. U. S. A.* **108**, 19377–19382 (2011).
- 42 181. Higgins, Cameron J, Yunzhe J Liu, Diego Vidaurre, Zeb Kurth-Nelson, Raymond J Dolan, Timothy  
43 E.J. Behrens, and Mark W Woolrich. 2020. “Replay Bursts Coincide with Activation of the Default  
44 Mode and Parietal Alpha Network.” *BioRxiv*, June, 2020.06.23.166645.  
45 <https://doi.org/10.1101/2020.06.23.166645>.
- 46 182. Jensen, O., Gips, B., Bergmann, T. O. & Bonnefond, M. Temporal coding organized by coupled alpha

- 1 and gamma oscillations prioritize visual processing. *Trends Neurosci* **37**, 357–369 (2014).
- 2 183. Buzsaki, G. & Watson, B. O. Brain rhythms and neural syntax: implications for efficient coding of  
3 cognitive content and neuropsychiatric disease. *Dialogues Clin Neurosci* **14**, 345–367
- 4 184. Meltzer, J. A., Fonzo, G. A. & Constable, R. T. Transverse patterning dissociates human EEG theta  
5 power and hippocampal BOLD activation. *Psychophysiology* **46**, 153–62 (2009).
- 6 185. Meltzer, J. A., Negishi, M. & Constable, R. T. Biphasic hemodynamic responses influence deactivation  
7 and may mask activation in block-design fMRI paradigms. *Hum. Brain Mapp.* **29**, 385–99 (2008).
- 8 186. Staresina, B. P. *et al.* Hippocampal pattern completion is linked to gamma power increases and alpha  
9 power decreases during recollection. *Elife* **5**, (2016).
- 10 187. Mullinger, K. J., Mayhew, S. D., Bagshaw, A. P., Bowtell, R. & Francis, S. T. Poststimulus  
11 undershoots in cerebral blood flow and BOLD fMRI responses are modulated by poststimulus neuronal  
12 activity. *Proc. Natl. Acad. Sci. U. S. A.* **110**, 13636–41 (2013).
- 13 188. Ances, B. M. *et al.* Regional differences in the coupling of cerebral blood flow and oxygen metabolism  
14 changes in response to activation: Implications for BOLD-fMRI. *Neuroimage* **39**, 1510–1521 (2008).
- 15 189. Vaishnavi, S. N. *et al.* Regional aerobic glycolysis in the human brain. *Proc. Natl. Acad. Sci. U. S. A.*  
16 **107**, 17757–62 (2010).
- 17 190. Shmuel, A. *et al.* Sustained negative BOLD, blood flow and oxygen consumption response and its  
18 coupling to the positive response in the human brain. *Neuron* (2002). doi:10.1016/S0896-  
19 6273(02)01061-9
- 20 191. Smallwood, J., Brown, K., Baird, B. & Schooler, J. W. Cooperation between the default mode network  
21 and the frontal-parietal network in the production of an internal train of thought. *Brain Research* **1428**,  
22 60–70 (2012).
- 23 192. Groot, Josephine, Nya Boayue, Gábor Csifcsák, Wouter Boekel, Rene Huster, Birte Forstmann, and  
24 Matthias Mittner. 2020. “Probing the Neural Signature of Mind Wandering with Simultaneous FMRI-  
25 EEG and Pupillometry.” *PsyArXiv*. <https://doi.org/10.31234/osf.io/24v3r>.
- 26 193. Enager, P. *et al.* Pathway-specific variations in neurovascular and neurometabolic coupling in rat  
27 primary somatosensory cortex. *J. Cereb. Blood Flow Metab.* **29**, 976–986 (2009).
- 28 194. Pelled, G. *et al.* Ipsilateral cortical fMRI responses after peripheral nerve damage in rats reflect  
29 increased interneuron activity. *Proc. Natl. Acad. Sci. U. S. A.* **106**, 14114–14119 (2009).
- 30 195. Yu, S. *et al.* Maintained avalanche dynamics during task-induced changes of neuronal activity in  
31 nonhuman primates. *Elife* **6**, (2017).
- 32 196. Massobrio, P., Pasquale, V. & Martinotia, S. Self-organized criticality in cortical assemblies occurs in  
33 concurrent scale-free and small-world networks OPEN. (2015). doi:10.1038/srep10578
- 34
